# Supplementary material for: Insights into the mechanisms of Ag-catalyzed synthesis of CF3-substituted heterocycles via [3+2]-cycloaddition from α-trifluoromethylated methyl isocyanides: effects of DBU and exploration of diastereoselectivity
Source: Royal Society of Chemistry journal article supplement (doi:10.1039/c9nj01033e), 2019-01-01
Supplement: c9nj01033e1.pdf [file c9nj01033e1.pdf]

# **Insights into the mechanisms of Ag-catalyzed synthesis of CF<sub>3</sub>-substituted heterocycles via [3+2]-cycloaddition from $\alpha$ -trifluoromethylated methyl isocyanides: effects of DBU and exploration of diastereoselectivity**

**Binfang Yuan,<sup>a, b</sup> Jinyang Chen,<sup>a</sup> Shuhua He,<sup>a</sup> Xiaohua Xie,<sup>a</sup> Yafei Luo,<sup>b, c</sup> Xiaogang Guo,<sup>a\*</sup> Huisheng Huang,<sup>a\*</sup> Rongxing He<sup>\*b</sup>**

<sup>a</sup> *Chongqing Key Laboratory of Inorganic Special Functional Materials, College of Chemistry and Chemical Engineering, Yangtze Normal University, Fuling, Chongqing 408100, China.*

<sup>b</sup> *College of Chemistry and Chemical Engineering, Southwest University, Chongqing 400715, China.*

<sup>c</sup> *Collaborative Innovation Center of Targeted Therapeutics and Innovation, Chongqing Key Laboratory of Kinase Modulators as Innovative Medicine, Chongqing Engineering Laboratory of Targeted and Innovative Therapeutics, International Academy of Targeted Therapeutics and Innovation, Chongqing University of Arts and Sciences, Chongqing, 402160, China.*

To whom correspondence should be addressed. E-mail: [herx@swu.edu.cn](mailto:herx@swu.edu.cn)

## Table of Contents:

|                                                                                                                                                                                                                                                      |           |
|------------------------------------------------------------------------------------------------------------------------------------------------------------------------------------------------------------------------------------------------------|-----------|
| <b>Table S1.</b> Exploring the effects of methods B3LYP, CAM-B3LYP, BLYP, B3PW91, M06 and PBEPBE by comparing the activation free energy barriers from <b>in3-b</b> to <b>ts2-b</b> .....                                                            | <b>3</b>  |
| <b>Table S2.</b> Exploring the effects of basis sets 6-31G*, 6-31G**, 6-31+G* and 6-311G* by comparing the activation free energy barriers from <b>in3-b</b> to <b>ts2-b</b> .....                                                                   | <b>4</b>  |
| <b>Scheme S1.</b> <b>1a</b> - and <b>2a</b> -assisted catalytic reactions, <b>1a</b> or <b>2a</b> act as the cocatalyst.....                                                                                                                         | <b>5</b>  |
| <b>Figure S1.</b> The scan profile from <b>in2-c</b> to <b>in3-c</b> along with the formation of H1-C1' bond (from 2.368 to 0.968 Å).<br>.....                                                                                                       | <b>6</b>  |
| <b>Figure S2.</b> The scan profile from <b>in2-d</b> to <b>in3-d</b> along with the formation of H1-O7' bond (from 2.174 to 0.944 Å).<br>.....                                                                                                       | <b>7</b>  |
| <b>Figure S3.</b> Optimized geometries involved in the Ag <sub>2</sub> CO <sub>3</sub> -catalyzed [3+2]-cycloaddition reaction to synthesize the products <b>P2</b> with DBU as the cocatalyst in toluene medium. Bond distances are given in Å..... | <b>8</b>  |
| <b>Table S3.</b> Exploring the diastereoselectivity of [3+2]-cycloaddition reaction by changing <b>R</b> ( <b>R1</b> or <b>R2</b> ) groups of <b>1a</b> and <b>2a</b> based on the theoretical calculations.....                                     | <b>10</b> |
| <b>Figure S4.</b> The angles of <b>R1</b> - with <b>R2</b> - vs. <b>R2</b> - with F <sub>3</sub> C-.....                                                                                                                                             | <b>11</b> |
| Intrinsic Reaction Coordinates.....                                                                                                                                                                                                                  | <b>12</b> |
| Cartesian coordinates of the optimized stationary points on the optimal reaction channels.....                                                                                                                                                       | <b>20</b> |

**Table S1.** Exploring the effects of methods B3LYP, CAM-B3LYP, BLYP, B3PW91, M06 and PBEPBE by comparing the activation free energy barriers from **in3-b** to **ts2-b** (the geometric structures of **in3-b** and **ts2-b** are optimized using B3LYP (CAM-B3LYP, BLYP, B3PW91, M06 and PBEPBE)/6-31G\* in gas phase, and the single point energies are obtained at the M06-2x/6-311++G\*\* calculated level in solution phase).

| Species      | Activation Free Energy Barriers (kJ/mol) |           |       |        |       |        |
|--------------|------------------------------------------|-----------|-------|--------|-------|--------|
|              | B3LYP                                    | CAM-B3LYP | BLYP  | B3PW91 | M06   | PBEPBE |
| <b>ts2-b</b> | 102.6                                    | 96.9      | 103.5 | 97.7   | 109.1 | 96.4   |

Table S1 shows that the effects of DFT functionals B3LYP, CAM-B3LYP, BLYP, B3PW91, M06 and PBEPBE on the activation free energy barrier are very small.

**Table S2.** Exploring the effects of basis sets 6-31G\*, 6-31G\*\*, 6-31+G\* and 6-311G\* by comparing the activation free energy barriers from **in3-b** to **ts2-b** (the geometric structures of **in3-b** and **ts2-b** are optimized using B3LYP/6-31G\* (6-31G\*\*, 6-31+G\* and 6-311G\*) in gas phase, and the single point energies are obtained at the M06-2x/6-311++G\*\* calculated level in solution phase).

| Species      | Activation Free Energy Barriers (kJ/mol) |         |         |         |
|--------------|------------------------------------------|---------|---------|---------|
|              | 6-31G*                                   | 6-31G** | 6-31+G* | 6-311G* |
| <b>ts2-b</b> | 102.6                                    | 104.3   | 104.9   | 98.0    |

Table S2 shows that the effects of basis sets 6-31G\*, 6-31G\*\*, 6-31+G\* and 6-311G\* on the activation free energy barrier are very small.

Scheme S1. **1a**- and **2a**-assisted catalytic reactions, **1a** or **2a** act as the cocatalyst.

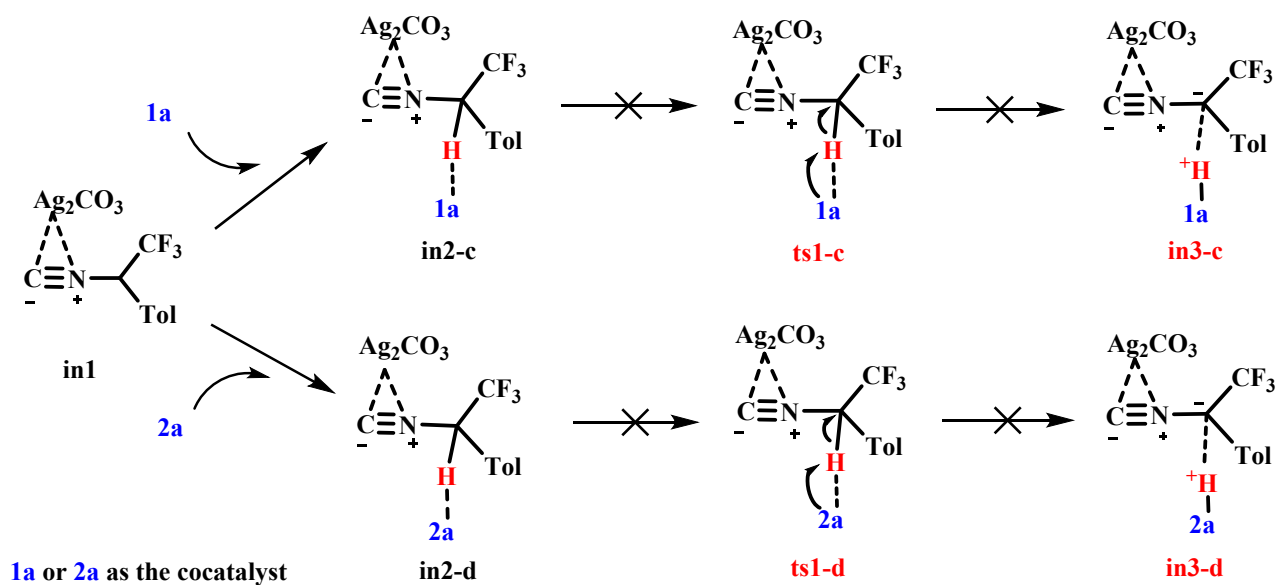

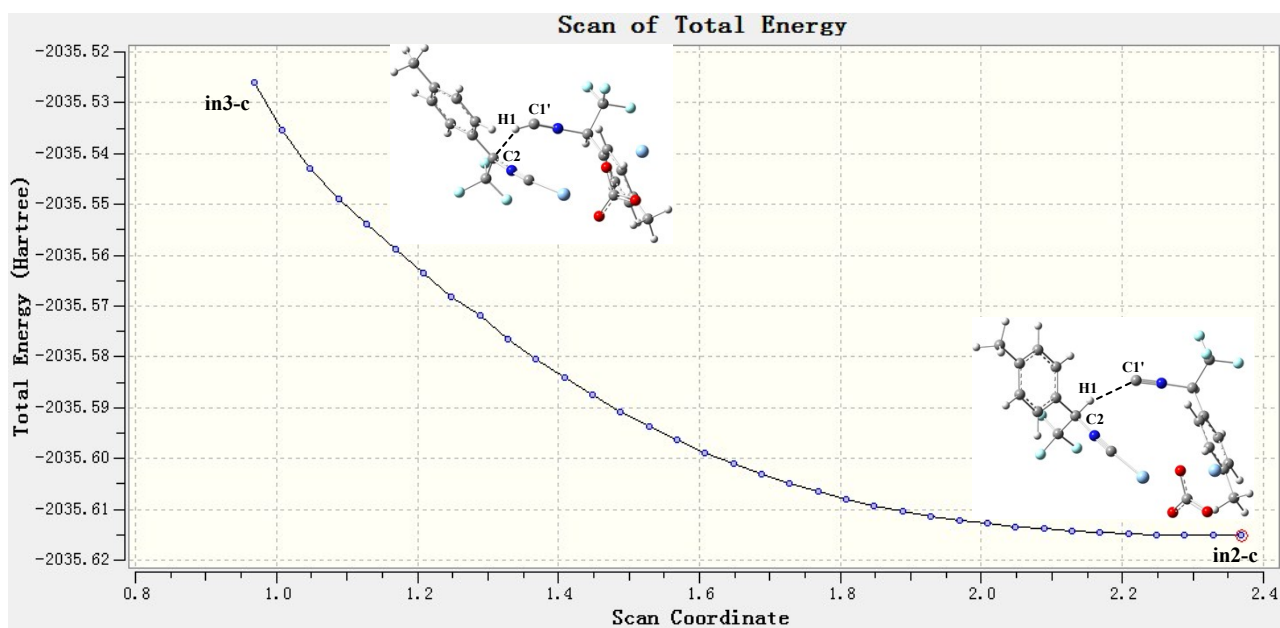

**Figure S1.** The scan profile from **in2-c** to **in3-c** along with the formation of H1-C1' bond (from 2.368 to 0.968 Å).

The scan profile shows that the energy is rising sharply along with the formation of H1-C1' bond (from 2.368 to 0.968 Å). Obviously, the **1a**-assisted H<sup>+</sup>-shift path (see Scheme S1) is unfavorable for the present catalytic reactions.

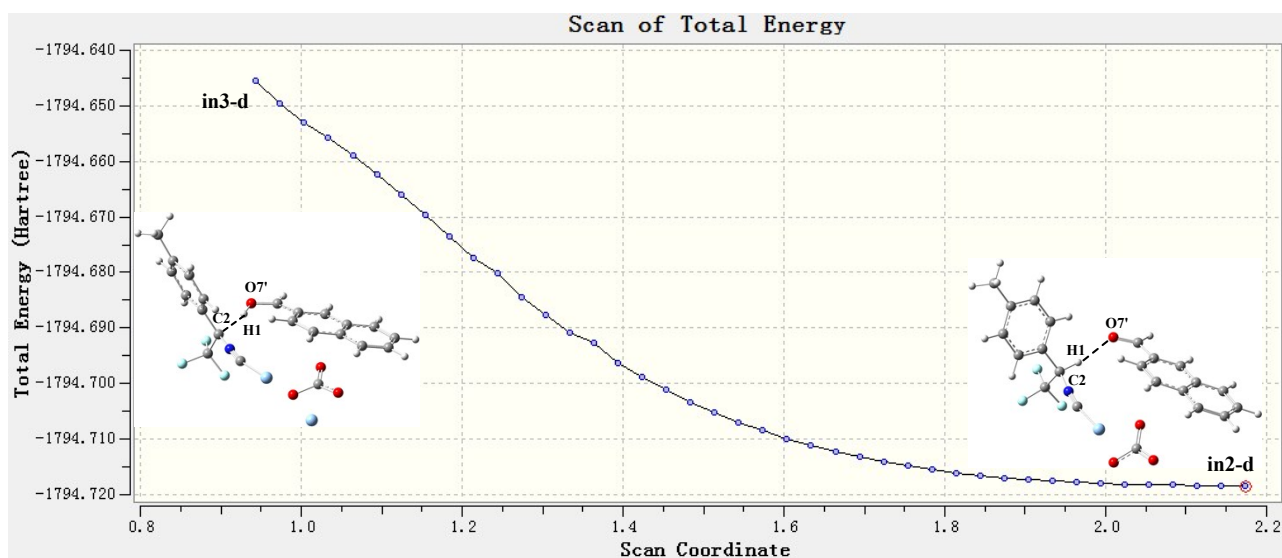

**Figure S2.** The scan profile from **in2-d** to **in3-d** along with the formation of H1-O7' bond (from 2.174 to 0.944 Å).

The scan profile shows that the energy is rising sharply along with the formation of H1-O7 bond (from 2.174 to 0.944 Å). Obviously, the **2a**-assisted H<sup>+</sup>-shift path (see Scheme S1) is unfavorable for the present catalytic reactions.

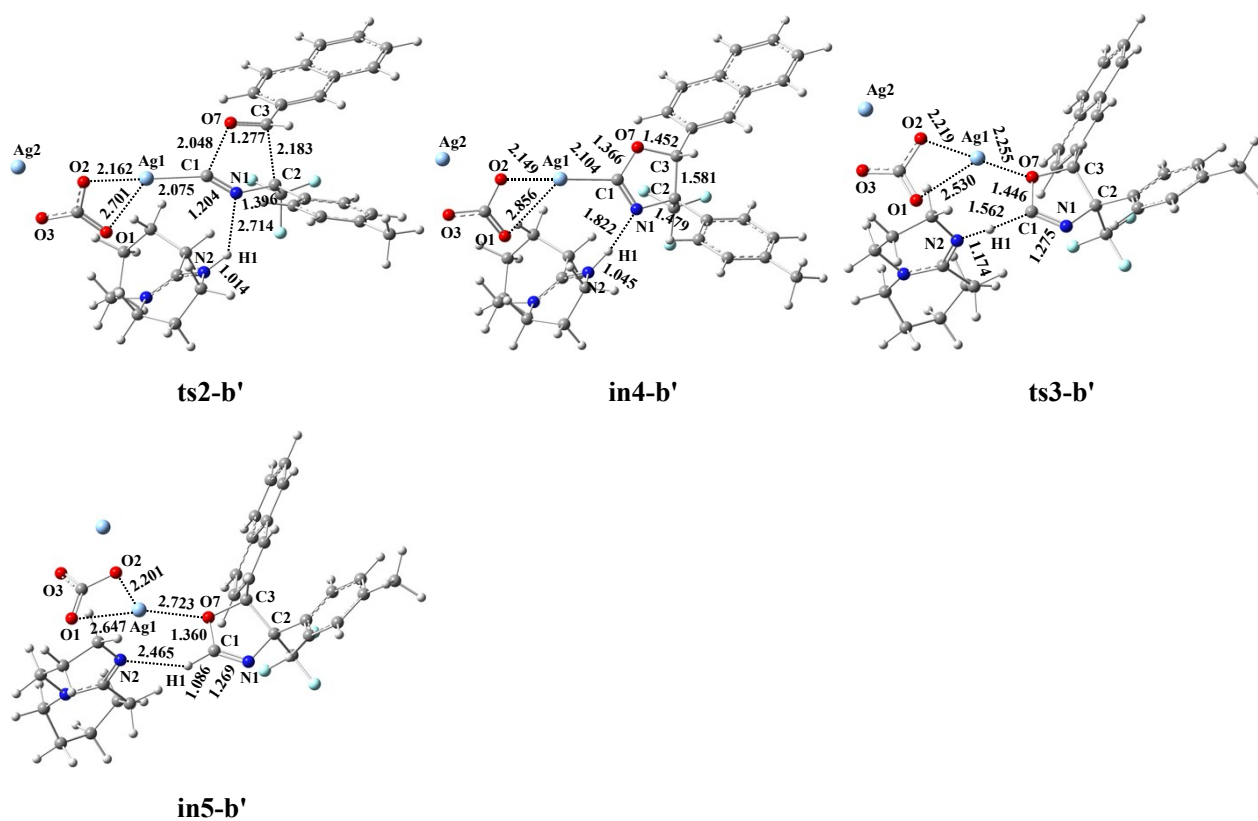

**Figure S3.** Optimized geometries involved in the  $\text{Ag}_2\text{CO}_3$ -catalyzed [3+2]-cycloaddition reaction to synthesize the products **P2** with DBU as the cocatalyst in toluene medium. Bond distances are given in Å.



Based on the Arrhenius equation (K. J. Laidler, *J. Chem. Educ.*, 1984, **61**(6), 494-498; S. R. Logan, *J. Chem. Educ.*, 1982, **59**(4), 279-281),

$$P1/P2 = \exp(-\Delta G_{ts2-b}/RT) / \exp(-\Delta G_{ts2-b'}/RT) \dots \text{Eq S1}$$

$$P1/P2 = \exp[(\Delta G_{ts2-b'} - \Delta G_{ts2-b})/RT] \dots \text{Eq S2}$$

$\Delta G_{ts2-b} = 106.7$  kJ/mol;  $\Delta G_{ts2-b'} = 110.9$  kJ/mol;  $R = 8.314$  J/mol·K;  $T = 298.15$  K.

$\Delta G_{ts2-b}$  and  $\Delta G_{ts2-b'}$  are the rate-determining free energy barriers of **P1**- and **P2**-fomed paths (see Figure 5).

Theoretical calculation result,

$$P1:P2 = 5.4:1.0$$

An **P1:P2**=5.4:1 is predicted by the theoretical calculations based on the energy difference of **ts2-b** and **ts2-b'**, and the similar calculations have been widely reported in previous literatures (H. Han, T. Zhang, S.-D. Yang, Y. Lan and J.-B. Xia, *Org. Lett.*, 2019, **21**, 1749-1754; H. Jiang, Q. Li, Q. Qi, C. Yang and D. Zhang, *Chinese J. Org. Chem.*, 2018, **38**, 825-831; Z. Yu, T. Zhang, R. Bai and Y. Lan, *Catal. Sci. Technol.*, 2019, **9**, 646-651; D. Wei, Q. Liu, L. Sun, S.-J. Li, X. Li, L.-B. Qu and Y. Lan, *Chem-Asian J.*, 2019 (<https://doi.org/10.1002/asia.201900076>)). Therefore, our calculated result is close to the experimental result (**P1:P2** =3.7:1.0, see Scheme 1).

**Table S3.** Exploring the diastereoselectivity of [3+2]-cycloaddition reaction by changing **R** (**R1** or **R2**) groups of **1a** and **2a** based on the theoretical calculations.

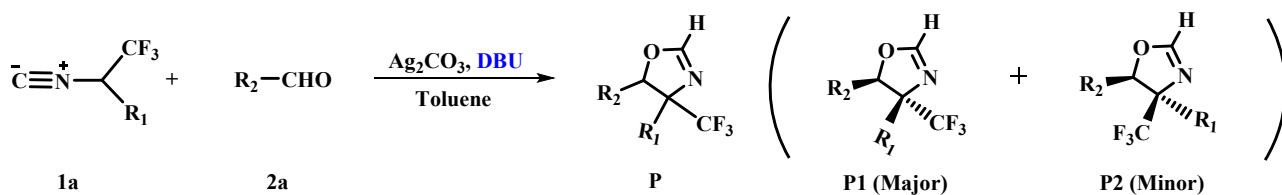

| <b>1a</b><br><b>R1 groups</b> | <b>2a</b><br><b>R2 groups</b> | <b>P1</b><br>$\alpha$ ( $^\circ$ )<br> | <b>P2</b><br>$\beta$ ( $^\circ$ )<br> | $\Delta\Delta G$<br>(kJ/mol)<br>$\Delta G' - \Delta G =$ | <b>Theoretical</b><br><b>results</b><br><b>(P1:P2)</b> | <b>Experimental</b><br><b>results</b><br><b>(P1:P2)</b> |
|-------------------------------|-------------------------------|----------------------------------------|---------------------------------------|----------------------------------------------------------|--------------------------------------------------------|---------------------------------------------------------|
|                               |                               | 37                                     | 25                                    | 4.2                                                      | 5.4:1.0                                                | 3.7:1.0                                                 |
|                               |                               | 39                                     | 26                                    | 6.0                                                      | 11.0:1.0                                               | 3.9:1.0                                                 |
|                               |                               | 40                                     | 28                                    | 3.4                                                      | 4.0:1.0                                                | 3.7:1.0                                                 |
|                               |                               | 38                                     | 30                                    | 1.3                                                      | 1.7:1.0                                                | 2.7:1.0                                                 |
|                               |                               | 40                                     | 24                                    | 7.2                                                      | 17.5:1.0                                               | 4.4:1.0                                                 |
|                               |                               | 44                                     | 30                                    | 6.6                                                      | 14.0:1.0                                               | 4.0:1.0                                                 |
|                               |                               | 36                                     | 26                                    | 2.8                                                      | 3.1:1.0                                                | 3.1:1.0                                                 |

These theoretical calculations reproduce the experimental results to some extent.

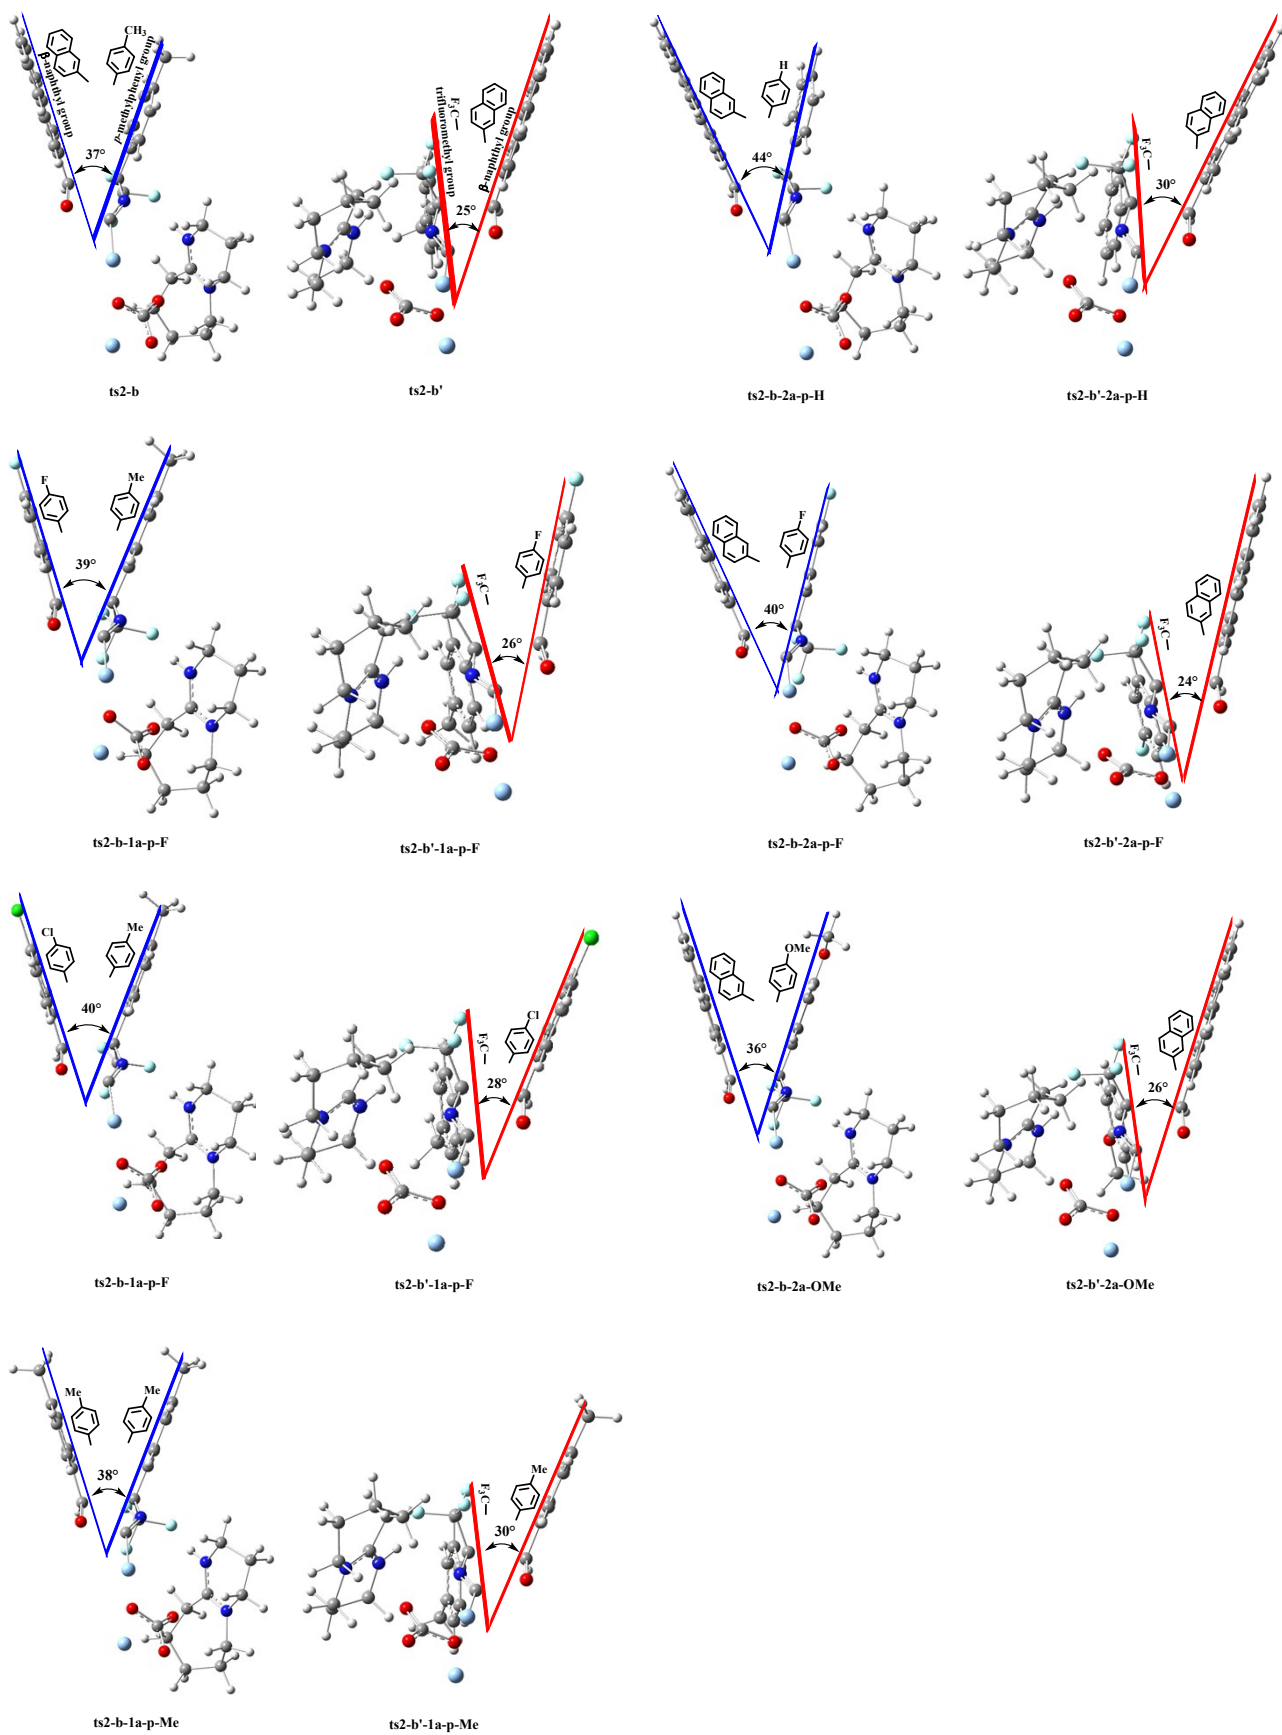

**Figure S4.** The angles of R1- with R2- vs. R2- with F<sub>3</sub>C-.

## Intrinsic Reaction Coordinates

When the animation of transition state's vibrations cannot easily confirm the reliability of transition states, the intrinsic reaction coordinate (IRC) calculations is conducted to unambiguously identify the transition states, which are connected with the reactants and the products.

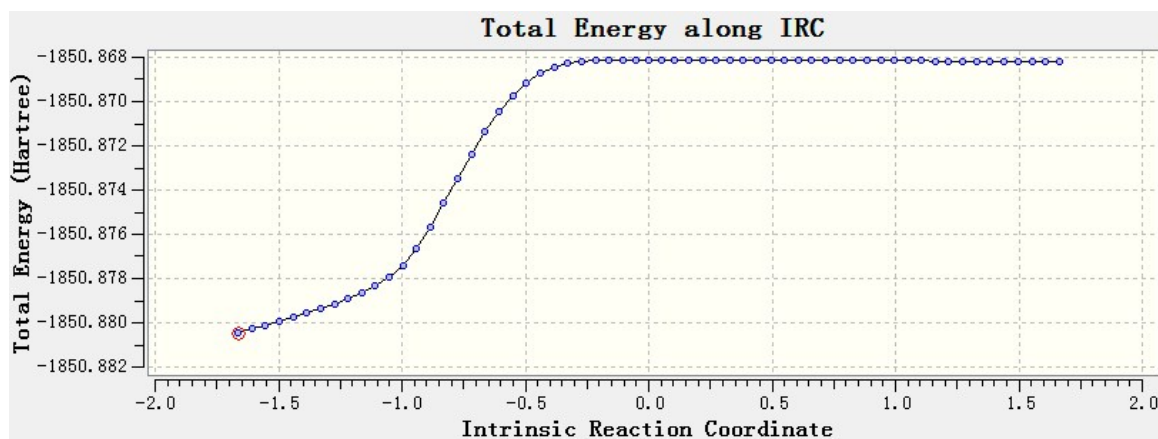

Figure S5. IRC of ts1-a.

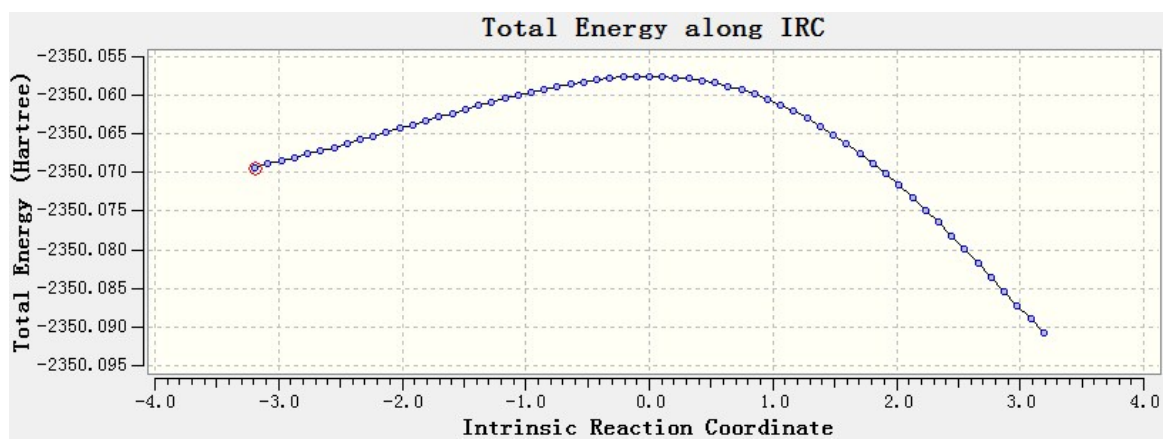

Figure S6. IRC of ts2-a.

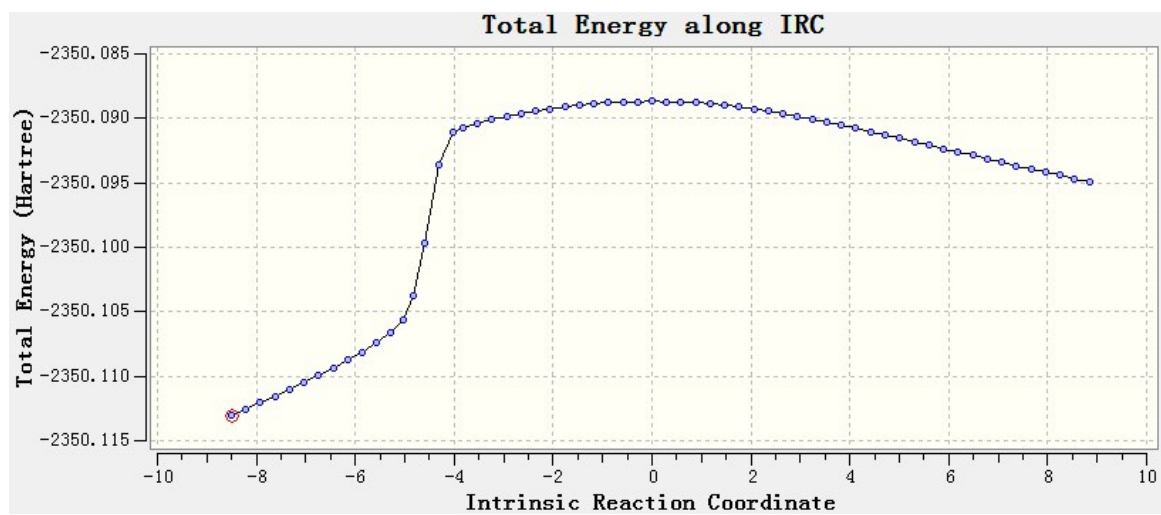

Figure S7. IRC of ts3-a.

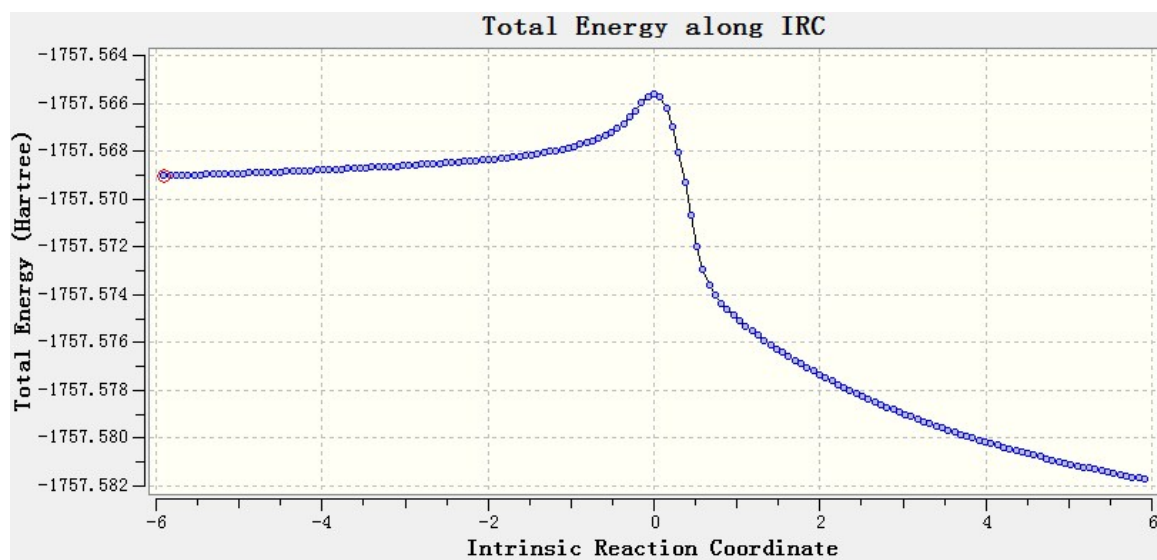

Figure S8. IRC of ts1-b.

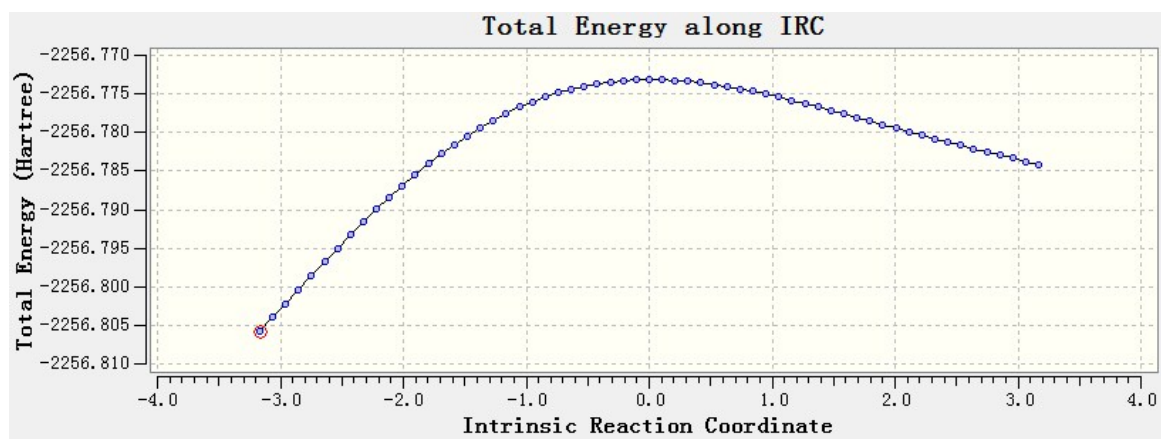

**Figure S9.** IRC of ts2-b.



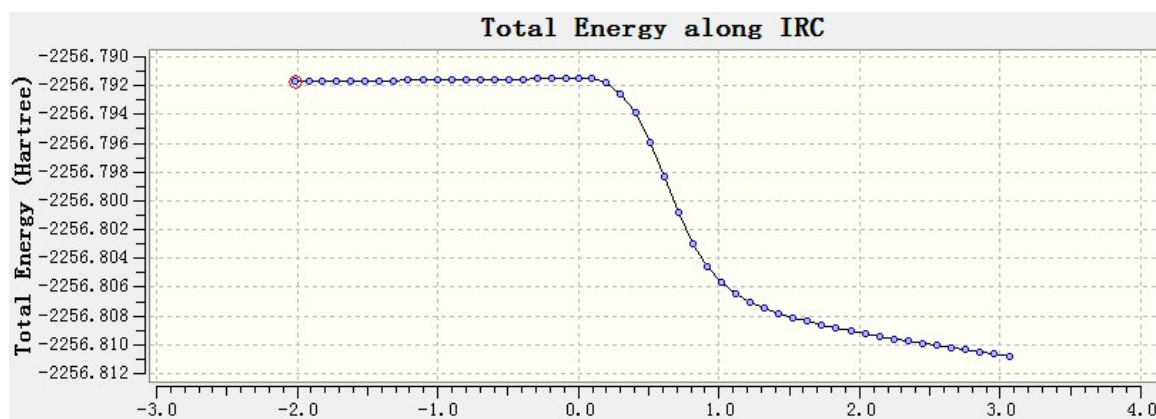

Figure S10. IRC of ts3-b.

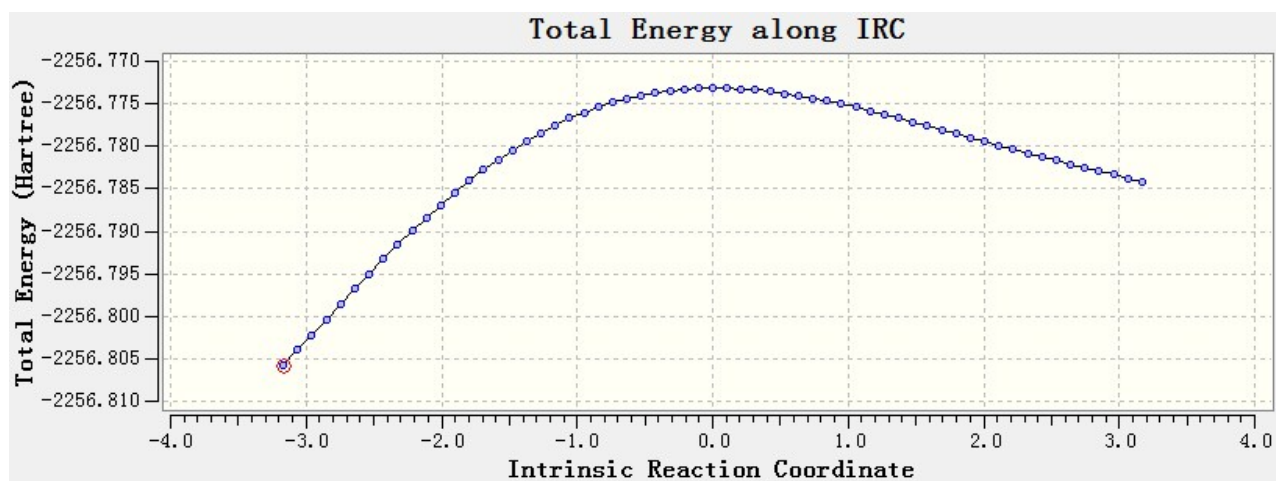

Figure S11. IRC of ts2-b'.

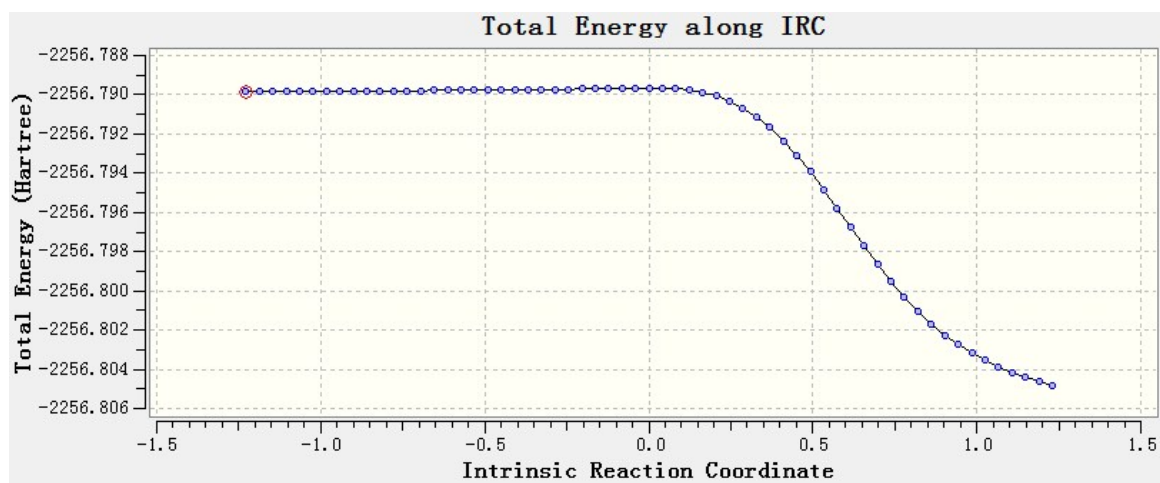

Figure S12. IRC of ts3-b'.

## Cartesian coordinates of the optimized stationary points on the optimal reaction channels

The solution-phase Gibbs free energy is determined by adding the solvation single-point energy and gas-phase thermal correction to the Gibbs free energy obtained from vibrational frequency calculation. Unless special emphasis, all the discussed energies are relative solution-phase Gibbs free energies ( $G_{\text{rel}}$ , kJ/mol) in this paper.

### 1a

|   |             |             |             |
|---|-------------|-------------|-------------|
| C | 1.23159900  | 0.21823000  | -0.69941300 |
| C | 2.02222500  | -0.66850400 | 0.28575800  |
| C | -0.26533900 | 0.16752600  | -0.43275300 |
| N | 1.75730500  | 1.53994000  | -0.64799100 |
| C | -1.05293100 | -0.76679200 | -1.10983000 |
| C | -0.86275400 | 1.00486600  | 0.51399200  |
| C | -2.22881000 | 0.91004300  | 0.76738700  |
| C | -3.03150600 | -0.01978900 | 0.09178300  |
| C | -2.41880700 | -0.85854400 | -0.84719800 |
| C | -4.51793100 | -0.09307500 | 0.34967900  |
| F | 3.33938900  | -0.62857300 | 0.01717000  |
| F | 1.84393900  | -0.28380700 | 1.55923200  |
| F | 1.61218300  | -1.94580800 | 0.16583800  |
| C | 2.18916700  | 2.63512400  | -0.58914200 |
| H | 1.44253900  | -0.19353000 | -1.69291800 |
| H | -0.59970700 | -1.43040700 | -1.84218800 |
| H | -0.26170400 | 1.73617300  | 1.04549500  |
| H | -2.67987300 | 1.56983600  | 1.50473000  |
| H | -3.01754800 | -1.59068000 | -1.38356000 |
| H | -4.91767000 | -1.08420300 | 0.11210500  |
| H | -4.75391200 | 0.12695400  | 1.39623400  |
| H | -5.06233900 | 0.63544600  | -0.26569600 |

B3LYP/6-31G\* (Lanl2DZ for Ag)

Thermal correction to Gibbs Free Energy = 0.118129

Sum of electronic and thermal Free Energies = -739.997854

M06-2x/6-311++G\*\* (Lanl2DZ for Ag)

Energy = -740.0656139

No imaginary frequency

### 2a

|   |             |            |            |
|---|-------------|------------|------------|
| C | -0.12610000 | 2.31758100 | 0.00000000 |
| C | -1.36736000 | 2.91294000 | 0.00000000 |
| C | -2.53881100 | 2.11710300 | 0.00000000 |
| C | -2.44972900 | 0.74199500 | 0.00000000 |
| C | -1.18665700 | 0.09601600 | 0.00000000 |
| C | 0.00000000  | 0.90235300 | 0.00000000 |
| C | 1.26070700  | 0.25429300 | 0.00000000 |

|   |             |             |            |
|---|-------------|-------------|------------|
| C | 1.35512300  | -1.12474400 | 0.00000000 |
| C | 0.17579200  | -1.92163500 | 0.00000000 |
| C | -1.05793700 | -1.32344700 | 0.00000000 |
| C | 2.68592500  | -1.76724500 | 0.00000000 |
| O | 2.87492000  | -2.96927500 | 0.00000000 |
| H | 0.77712200  | 2.92313100  | 0.00000000 |
| H | -1.45343300 | 3.99589800  | 0.00000000 |
| H | -3.51316700 | 2.59804300  | 0.00000000 |
| H | -3.34983500 | 0.13198400  | 0.00000000 |
| H | 2.16652800  | 0.85896500  | 0.00000000 |
| H | 0.28747700  | -3.00123900 | 0.00000000 |
| H | -1.96247200 | -1.92711200 | 0.00000000 |
| H | 3.54270100  | -1.05673900 | 0.00000000 |

B3LYP/6-31G\* (Lanl2DZ for Ag)

Thermal correction to Gibbs Free Energy = 0.123047

Sum of electronic and thermal Free Energies = -499.095217

M06-2x/6-311++G\*\* (Lanl2DZ for Ag)

Energy = -499.1373521

No imaginary frequency

### Ag<sub>2</sub>CO<sub>3</sub>

|    |             |             |             |
|----|-------------|-------------|-------------|
| C  | -0.00002100 | 0.98637900  | -0.00016500 |
| O  | -0.00004600 | -0.35362800 | 0.00043600  |
| O  | -1.12798500 | 1.59611900  | -0.00009700 |
| O  | 1.12794000  | 1.59611000  | 0.00019300  |
| Ag | 2.32022900  | -0.30453900 | -0.00004700 |
| Ag | -2.32021100 | -0.30454800 | -0.00002300 |

B3LYP/6-31G\* (Lanl2DZ for Ag)

Thermal correction to Gibbs Free Energy = -0.018057

Sum of electronic and thermal Free Energies = -555.352418

M06-2x/6-311++G\*\* (Lanl2DZ for Ag)

Energy = -2119.0429148

No imaginary frequency

### DBU

|   |             |             |             |
|---|-------------|-------------|-------------|
| C | 0.84271000  | 1.47411100  | 0.27465600  |
| C | 2.12642700  | 1.15991500  | -0.50360400 |
| N | -0.34261700 | 0.67727800  | -0.07296400 |
| C | 2.95865400  | 0.00495500  | 0.07769200  |
| C | 2.10096800  | -1.18765800 | 0.53038900  |
| C | 0.92050000  | -1.48180700 | -0.41433900 |
| C | -0.37024500 | -0.72135200 | -0.13317200 |
| C | -1.59389700 | 1.35774300  | 0.27655500  |
| C | -2.79477100 | 0.60668200  | -0.28506000 |
| C | -2.72479100 | -0.84686200 | 0.18228700  |
| N | -1.42219000 | -1.45953500 | -0.03968200 |

|   |             |             |             |
|---|-------------|-------------|-------------|
| H | 0.56361700  | 2.51177400  | 0.05971600  |
| H | 1.04208800  | 1.43349300  | 1.36063800  |
| H | 2.74188800  | 2.06816500  | -0.52315200 |
| H | 1.85241100  | 0.95665800  | -1.54551400 |
| H | 3.55328500  | 0.36863300  | 0.92621700  |
| H | 3.67962800  | -0.32416500 | -0.68226500 |
| H | 1.71354300  | -1.01344600 | 1.54287800  |
| H | 2.73402100  | -2.08003500 | 0.60432100  |
| H | 0.62987600  | -2.53143300 | -0.34369500 |
| H | 1.22750300  | -1.31056400 | -1.45607000 |
| H | -1.54969300 | 2.37541800  | -0.13121000 |
| H | -1.68990500 | 1.45673300  | 1.37213900  |
| H | -2.76379800 | 0.64418100  | -1.38114900 |
| H | -3.72447400 | 1.09143400  | 0.03630100  |
| H | -3.47768000 | -1.45378700 | -0.33686000 |
| H | -2.97198900 | -0.91162700 | 1.25380800  |

B3LYP/6-31G\* (Lan12DZ for Ag)

Thermal correction to Gibbs Free Energy = 0.212154

Sum of electronic and thermal Free Energies = -461.875027

M06-2x/6-311++G\*\* (Lan12DZ for Ag)

Energy = -462.0017221

No imaginary frequency

### in1

|   |            |             |             |
|---|------------|-------------|-------------|
| C | 3.33985800 | 1.11802300  | -0.63058200 |
| C | 3.57516200 | 2.38456200  | 0.22023800  |
| C | 4.20052300 | -0.05978600 | -0.20712200 |
| N | 1.94611800 | 0.80485500  | -0.60005000 |
| C | 5.25794900 | -0.46439800 | -1.02384700 |
| C | 3.96079900 | -0.74133600 | 0.99316900  |
| C | 4.77059800 | -1.81150300 | 1.35894900  |
| C | 5.83888000 | -2.22801800 | 0.54836100  |
| C | 6.06817500 | -1.53590200 | -0.64575900 |
| C | 6.70719600 | -3.39286900 | 0.96040100  |
| F | 2.81997900 | 3.40133800  | -0.23122100 |
| F | 3.27379100 | 2.18432400  | 1.51348900  |
| F | 4.86533500 | 2.74242800  | 0.12948900  |
| C | 0.81621800 | 0.50874000  | -0.59403600 |
| H | 3.58675200 | 1.40475100  | -1.65839900 |
| H | 5.45241600 | 0.05250200  | -1.96046600 |
| H | 3.14152500 | -0.44027600 | 1.63877400  |
| H | 4.56988200 | -2.33452300 | 2.29079900  |
| H | 6.88518900 | -1.84090800 | -1.29432700 |
| H | 7.47376800 | -3.60706200 | 0.20973900  |
| H | 7.21545500 | -3.19129000 | 1.91138600  |
| H | 6.11040700 | -4.30212900 | 1.10096200  |

|    |             |             |             |
|----|-------------|-------------|-------------|
| C  | -3.69627300 | -0.89307700 | -0.82173100 |
| O  | -4.91998500 | -1.27022500 | -0.88347500 |
| O  | -3.33781500 | -0.00727400 | 0.11490000  |
| O  | -2.77902700 | -1.31334100 | -1.60898700 |
| Ag | -1.15304900 | -0.10338000 | -0.69333200 |
| Ag | -5.51567600 | 0.04151300  | 0.84925400  |

B3LYP/6-31G\* (Lanl2DZ for Ag)

Thermal correction to Gibbs Free Energy = 0.117857

Sum of electronic and thermal Free Energies = -1295.374078

M06-2x/6-311++G\*\* (Lanl2DZ for Ag)

Energy = -1295.2739829

No imaginary frequency

**in2-a**

|    |             |             |             |
|----|-------------|-------------|-------------|
| C  | -2.63135500 | -1.85064400 | -0.85161700 |
| C  | -3.14307600 | -2.63164900 | -2.06747400 |
| C  | -3.53479700 | -1.91904700 | 0.36647700  |
| N  | -1.29471000 | -2.29698700 | -0.56132200 |
| C  | -4.07630500 | -0.72680300 | 0.85998400  |
| C  | -3.82342900 | -3.12891200 | 1.01177600  |
| C  | -4.65258900 | -3.14297700 | 2.13003100  |
| C  | -5.21611100 | -1.95911000 | 2.62930100  |
| C  | -4.91135600 | -0.75797300 | 1.97832700  |
| C  | -6.14041600 | -1.98816500 | 3.82427800  |
| F  | -2.32018700 | -2.46960900 | -3.12080500 |
| F  | -3.23196600 | -3.96062200 | -1.83253300 |
| F  | -4.36062200 | -2.18596400 | -2.40798400 |
| C  | -0.16036900 | -2.44090400 | -0.35141700 |
| H  | -2.49425800 | -0.79503100 | -1.15295600 |
| H  | -3.83941300 | 0.22384000  | 0.38470800  |
| H  | -3.40349600 | -4.05951900 | 0.64282600  |
| H  | -4.86692100 | -4.08837200 | 2.62351700  |
| H  | -5.32692500 | 0.17453400  | 2.35330400  |
| H  | -6.17878300 | -1.01495500 | 4.32452300  |
| H  | -7.16606800 | -2.24305600 | 3.52530300  |
| H  | -5.82320500 | -2.73626000 | 4.55937500  |
| C  | 3.71898800  | 0.07214700  | -0.25214300 |
| O  | 4.64707700  | 0.92572100  | -0.05778000 |
| O  | 3.85067100  | -1.14840200 | 0.26676800  |
| O  | 2.65817600  | 0.29735700  | -0.93973000 |
| Ag | 1.86118000  | -1.97830200 | -0.12156500 |
| Ag | 5.96638400  | -0.49304600 | 1.06996800  |
| C  | -1.76149100 | 1.95665400  | -0.63239300 |
| O  | -0.78179500 | 2.86282700  | -0.45247900 |
| O  | -1.46040900 | 0.81337900  | -1.06726500 |
| O  | -2.96166900 | 2.33497700  | -0.32522800 |

|    |             |            |             |
|----|-------------|------------|-------------|
| Ag | -2.30701700 | 4.39323100 | 0.31429500  |
| Ag | 1.02741900  | 1.70749800 | -0.80194400 |

B3LYP/6-31G\* (Lan12DZ for Ag)  
 Thermal correction to Gibbs Free Energy = 0.122561  
 Sum of electronic and thermal Free Energies = -1850.771572  
 M06-2x/6-311++G\*\* (Lan12DZ for Ag)  
 Energy = -1850.5058135  
 No imaginary frequency

**ts1-a**

|    |             |             |             |
|----|-------------|-------------|-------------|
| C  | -2.43901500 | -1.79944500 | -1.01645000 |
| C  | -3.05325200 | -1.85324500 | -2.38650200 |
| C  | -3.26724100 | -2.17311200 | 0.16427800  |
| N  | -1.14826300 | -2.30334400 | -1.02329700 |
| C  | -4.63869500 | -1.85488100 | 0.22873600  |
| C  | -2.70030700 | -2.79938100 | 1.28780700  |
| C  | -3.46410900 | -3.08959400 | 2.41773600  |
| C  | -4.82503600 | -2.77445000 | 2.48263400  |
| C  | -5.39186500 | -2.15666000 | 1.35924100  |
| C  | -5.64598100 | -3.06458800 | 3.71770900  |
| F  | -2.12584000 | -1.63145700 | -3.34697900 |
| F  | -3.65400300 | -3.03526200 | -2.69446800 |
| F  | -4.01342600 | -0.90247700 | -2.53573500 |
| C  | -0.00884900 | -2.56999100 | -0.97052400 |
| H  | -1.96188300 | -0.26468200 | -0.80750100 |
| H  | -5.11982000 | -1.36607200 | -0.60962200 |
| H  | -1.65015500 | -3.07505200 | 1.27875700  |
| H  | -2.98729000 | -3.58058900 | 3.26413200  |
| H  | -6.45015400 | -1.90176300 | 1.36672000  |
| H  | -5.75867100 | -2.17166300 | 4.34862200  |
| H  | -6.65617500 | -3.40366600 | 3.45977000  |
| H  | -5.17948200 | -3.84039300 | 4.33476300  |
| C  | 3.64009700  | 0.18545900  | 0.06844500  |
| O  | 4.44354300  | 0.94251200  | 0.70974400  |
| O  | 3.83047600  | -1.13025000 | 0.11324500  |
| O  | 2.65474500  | 0.60860500  | -0.63831400 |
| Ag | 1.96391300  | -1.99380100 | -0.62050600 |
| Ag | 5.69673600  | -0.76927100 | 1.47583700  |
| C  | -1.87395700 | 1.71281400  | -0.28412600 |
| O  | -1.05184600 | 2.68937900  | 0.00025400  |
| O  | -1.30766100 | 0.58523500  | -0.63897500 |
| O  | -3.12570500 | 1.86587700  | -0.21769700 |
| Ag | -2.97154300 | 4.03210000  | 0.44031400  |
| Ag | 1.00616100  | 1.90260500  | -0.20989900 |

B3LYP/6-31G\* (Lan12DZ for Ag)  
 Thermal correction to Gibbs Free Energy = 0.119889



Sum of electronic and thermal Free Energies = -1850.748220

M06-2x/6-311++G\*\* (Lanl2DZ for Ag)

Energy = -1850.4904308

Number of Imaginary Frequencies = 1

Lowest Frequency = 111.41i

**in3-a**

|    |             |             |             |
|----|-------------|-------------|-------------|
| C  | -2.53385500 | -2.12496300 | -0.65466500 |
| C  | -2.88782500 | -2.92036700 | -1.86739800 |
| C  | -3.52298800 | -1.85636100 | 0.40173700  |
| N  | -1.22953500 | -2.23432300 | -0.28713000 |
| C  | -4.91162000 | -1.93392200 | 0.15932700  |
| C  | -3.12003700 | -1.47190400 | 1.69638700  |
| C  | -4.05297600 | -1.17999100 | 2.68860800  |
| C  | -5.42986400 | -1.26072700 | 2.44880800  |
| C  | -5.83144900 | -1.64352200 | 1.16113100  |
| C  | -6.44078500 | -0.98024800 | 3.53614500  |
| F  | -1.80602100 | -3.13665800 | -2.65000400 |
| F  | -3.42744000 | -4.14394700 | -1.60273100 |
| F  | -3.81483900 | -2.28074300 | -2.63614700 |
| C  | -0.09726500 | -2.20691400 | 0.02726200  |
| H  | -2.07208700 | -0.36819000 | -1.41931200 |
| H  | -5.27494600 | -2.21460400 | -0.82205900 |
| H  | -2.06181500 | -1.40509800 | 1.93211100  |
| H  | -3.69858700 | -0.89192900 | 3.67700500  |
| H  | -6.89333000 | -1.71724200 | 0.93336200  |
| H  | -6.82111600 | -1.90821200 | 3.98570100  |
| H  | -6.00375100 | -0.38474800 | 4.34554500  |
| H  | -7.30936100 | -0.43416400 | 3.14907700  |
| C  | 4.07713500  | 0.64660300  | -0.30782900 |
| O  | 5.33951300  | 0.86157700  | -0.27265000 |
| O  | 3.62231900  | -0.37847800 | 0.41424800  |
| O  | 3.30293100  | 1.37927500  | -1.00806400 |
| Ag | 1.74857200  | -1.30304700 | 0.17497100  |
| Ag | 5.85680400  | -0.85791800 | 1.04374000  |
| C  | -1.78069300 | 1.49030400  | -0.96555800 |
| O  | -0.85190800 | 2.37170400  | -0.77077000 |
| O  | -1.40070900 | 0.36959800  | -1.56134000 |
| O  | -2.97489400 | 1.68503800  | -0.61758700 |
| Ag | -2.59056100 | 3.73011600  | 0.26941500  |
| Ag | 1.22075400  | 1.69380500  | -0.87506200 |

B3LYP/6-31G\* (Lanl2DZ for Ag)

Thermal correction to Gibbs Free Energy = 0.121449

Sum of electronic and thermal Free Energies = -1850.747013

M06-2x/6-311++G\*\* (Lanl2DZ for Ag)

Energy = -1850.4921635

No imaginary frequency

**ts2-a**

|    |             |             |             |
|----|-------------|-------------|-------------|
| C  | -2.25244200 | 0.94797800  | 0.47810200  |
| C  | -1.89024100 | 2.35234500  | 0.07304900  |
| C  | -3.43235400 | 0.77370200  | 1.36909000  |
| N  | -1.09255200 | 0.28724200  | 0.87624200  |
| C  | -4.62038900 | 1.51286700  | 1.21779500  |
| C  | -3.41232400 | -0.21333100 | 2.37142400  |
| C  | -4.51998600 | -0.44551300 | 3.18134400  |
| C  | -5.70220800 | 0.29015300  | 3.03086400  |
| C  | -5.72219300 | 1.27466800  | 2.03680100  |
| C  | -6.91592200 | 0.01312300  | 3.88640100  |
| F  | -0.79076100 | 2.38698000  | -0.71555700 |
| F  | -2.87507100 | 2.97991200  | -0.60040800 |
| F  | -1.58996000 | 3.18131500  | 1.14683900  |
| C  | -0.27371200 | -0.43681100 | 0.38797600  |
| H  | -4.69369300 | 2.28376100  | 0.46160400  |
| H  | -2.50974000 | -0.79641900 | 2.52441900  |
| H  | -4.46111700 | -1.21294200 | 3.95070500  |
| H  | -6.62160500 | 1.87000300  | 1.89285800  |
| H  | -7.52600900 | 0.91328900  | 4.02119900  |
| H  | -7.56111100 | -0.74968200 | 3.42923900  |
| H  | -6.63281700 | -0.35482700 | 4.87900400  |
| C  | 4.49223800  | -2.09884700 | 0.66494200  |
| O  | 5.38909600  | -3.01124100 | 0.71342600  |
| O  | 3.38773900  | -2.37337100 | -0.02942200 |
| O  | 4.65423100  | -0.97822200 | 1.25638800  |
| Ag | 1.54160900  | -1.38846800 | 0.22415300  |
| H  | 0.28257600  | 3.06536300  | 1.74007900  |
| C  | 1.79072200  | 3.30501800  | 0.63319200  |
| O  | 2.89460500  | 2.78571200  | 0.22848800  |
| O  | 1.19625300  | 2.72032100  | 1.67367400  |
| O  | 1.27614100  | 4.31952400  | 0.09020300  |
| Ag | 2.71225800  | 4.37697200  | -1.64106500 |
| Ag | 3.59800800  | 0.80808700  | 0.84002700  |
| C  | -7.23947700 | -0.48973900 | -2.20228600 |
| C  | -8.39671900 | -1.23644100 | -2.17366100 |
| C  | -8.37404200 | -2.57126100 | -1.69941000 |
| C  | -7.19256700 | -3.13138100 | -1.26421500 |
| C  | -5.98245900 | -2.38887500 | -1.28152100 |
| C  | -6.00445100 | -1.03722500 | -1.75961400 |
| C  | -4.79352500 | -0.29718000 | -1.77914600 |
| C  | -3.60013300 | -0.85113000 | -1.35792400 |
| C  | -3.58703000 | -2.19472000 | -0.89188500 |
| C  | -4.74209200 | -2.93670000 | -0.85052000 |

|    |             |             |             |
|----|-------------|-------------|-------------|
| C  | -2.32417900 | -0.07952700 | -1.42843600 |
| O  | -1.20698300 | -0.70392100 | -1.44311600 |
| H  | -7.25510800 | 0.53549800  | -2.56583700 |
| H  | -9.33322900 | -0.80339100 | -2.51574100 |
| H  | -9.29282300 | -3.15171700 | -1.68124800 |
| H  | -7.17075900 | -4.15653700 | -0.90048400 |
| H  | -4.81243300 | 0.72814800  | -2.14580200 |
| H  | -2.63483800 | -2.61762600 | -0.58749900 |
| H  | -4.72271500 | -3.96414200 | -0.49238200 |
| H  | -2.40782400 | 0.86025900  | -1.99736700 |
| Ag | 4.27041300  | -4.51640000 | -0.49536300 |

B3LYP/6-31G\* (Lan12DZ for Ag)

Thermal correction to Gibbs Free Energy = 0.268835

Sum of electronic and thermal Free Energies = -2349.788710

M06-2x/6-311++G\*\* (Lan12DZ for Ag)

Energy = -2349.6191180

Number of Imaginary Frequencies = 1

Lowest Frequency = 382.23i

**in4-a**

|    |             |             |             |
|----|-------------|-------------|-------------|
| C  | 1.95731900  | -1.26014300 | -0.80961000 |
| C  | 2.16073200  | 0.12223600  | -1.47541100 |
| C  | 2.72339300  | -2.33191800 | -1.58945000 |
| N  | 0.49559700  | -1.47842500 | -0.79447600 |
| C  | 4.12258800  | -2.28363100 | -1.70017400 |
| C  | 2.05100300  | -3.39094100 | -2.20660500 |
| C  | 2.75468600  | -4.36710500 | -2.91515900 |
| C  | 4.14656100  | -4.32100200 | -3.03337900 |
| C  | 4.81675000  | -3.26038200 | -2.40777700 |
| C  | 4.90651000  | -5.36308600 | -3.82031400 |
| F  | 1.43055000  | 1.07827300  | -0.85764300 |
| F  | 3.45194800  | 0.53504800  | -1.41548100 |
| F  | 1.79780200  | 0.10848500  | -2.77048300 |
| C  | 0.03671800  | -1.31605800 | 0.40702400  |
| H  | 4.67956400  | -1.48239300 | -1.22906500 |
| H  | 0.97205500  | -3.45517100 | -2.14646400 |
| H  | 2.20277800  | -5.17662900 | -3.38749200 |
| H  | 5.90113400  | -3.19858700 | -2.47122900 |
| H  | 5.79781800  | -5.70308900 | -3.27998400 |
| H  | 4.28385800  | -6.23885200 | -4.02991400 |
| H  | 5.24763400  | -4.96345500 | -4.78466100 |
| C  | -4.59221600 | 0.35857200  | 0.91572400  |
| O  | -5.72936900 | 0.66614900  | 1.42341000  |
| O  | -4.04001200 | -0.78689400 | 1.31060400  |
| O  | -4.01981700 | 1.13115100  | 0.07315100  |
| Ag | -1.97894300 | -1.16233700 | 0.93869200  |

|    |             |             |             |
|----|-------------|-------------|-------------|
| H  | -0.38831700 | -1.65280200 | -2.07397000 |
| C  | -1.27050800 | -0.95649800 | -3.71762700 |
| O  | -1.46232700 | 0.23767500  | -3.21450400 |
| O  | -0.86483600 | -1.94319900 | -2.96134500 |
| O  | -1.48085600 | -1.17272400 | -4.94681800 |
| Ag | -2.07246100 | 0.93266700  | -5.43793500 |
| Ag | -2.58325900 | 0.57325900  | -1.38771400 |
| C  | 6.43244800  | -2.70466300 | 3.05403600  |
| C  | 7.17012300  | -3.70934500 | 3.64094700  |
| C  | 6.65468200  | -5.02687700 | 3.71018700  |
| C  | 5.41063500  | -5.31415900 | 3.19227600  |
| C  | 4.62608400  | -4.30112500 | 2.58044300  |
| C  | 5.14804900  | -2.96953800 | 2.50801600  |
| C  | 4.35978900  | -1.95782000 | 1.89560200  |
| C  | 3.11775100  | -2.23237000 | 1.36372100  |
| C  | 2.60235800  | -3.55613200 | 1.44910500  |
| C  | 3.33585600  | -4.55635800 | 2.03862100  |
| C  | 2.30799600  | -1.13253600 | 0.72574000  |
| O  | 0.98499800  | -1.08946100 | 1.34791900  |
| H  | 6.82596900  | -1.69214000 | 3.00006900  |
| H  | 8.15214800  | -3.49411800 | 4.05348800  |
| H  | 7.24587800  | -5.81129700 | 4.17506300  |
| H  | 5.01177000  | -6.32459900 | 3.24471400  |
| H  | 4.75758200  | -0.94538900 | 1.85230100  |
| H  | 1.61911200  | -3.77115900 | 1.04269100  |
| H  | 2.93433900  | -5.56530100 | 2.09707500  |
| H  | 2.78168900  | -0.17065300 | 0.93207700  |
| Ag | -5.91760900 | -1.14089800 | 2.70526300  |

B3LYP/6-31G\* (Lanl2DZ for Ag)

Thermal correction to Gibbs Free Energy = 0.276440

Sum of electronic and thermal Free Energies = -2349.852678

M06-2x/6-311++G\*\* (Lanl2DZ for Ag)

Energy = -2349.6912155

No imaginary frequency

**ts3-a**

|   |            |             |             |
|---|------------|-------------|-------------|
| C | 1.95731900 | -1.26014300 | -0.80961000 |
| C | 2.16073200 | 0.12223600  | -1.47541100 |
| C | 2.72339300 | -2.33191800 | -1.58945000 |
| N | 0.49559700 | -1.47842500 | -0.79447600 |
| C | 4.12258800 | -2.28363100 | -1.70017400 |
| C | 2.05100300 | -3.39094100 | -2.20660500 |
| C | 2.75468600 | -4.36710500 | -2.91515900 |
| C | 4.14656100 | -4.32100200 | -3.03337900 |
| C | 4.81675000 | -3.26038200 | -2.40777700 |
| C | 4.90651000 | -5.36308600 | -3.82031400 |

|    |             |             |             |
|----|-------------|-------------|-------------|
| F  | 1.43055000  | 1.07827300  | -0.85764300 |
| F  | 3.45194800  | 0.53504800  | -1.41548100 |
| F  | 1.79780200  | 0.10848500  | -2.77048300 |
| C  | 0.03671800  | -1.31605800 | 0.40702400  |
| H  | 4.67956400  | -1.48239300 | -1.22906500 |
| H  | 0.97205500  | -3.45517100 | -2.14646400 |
| H  | 2.20277800  | -5.17662900 | -3.38749200 |
| H  | 5.90113400  | -3.19858700 | -2.47122900 |
| H  | 5.79781800  | -5.70308900 | -3.27998400 |
| H  | 4.28385800  | -6.23885200 | -4.02991400 |
| H  | 5.24763400  | -4.96345500 | -4.78466100 |
| C  | -4.59221600 | 0.35857200  | 0.91572400  |
| O  | -5.72936900 | 0.66614900  | 1.42341000  |
| O  | -4.04001200 | -0.78689400 | 1.31060400  |
| O  | -4.01981700 | 1.13115100  | 0.07315100  |
| Ag | -1.97894300 | -1.16233700 | 0.93869200  |
| H  | -0.38831700 | -1.65280200 | -2.07397000 |
| C  | -1.27050800 | -0.95649800 | -3.71762700 |
| O  | -1.46232700 | 0.23767500  | -3.21450400 |
| O  | -0.86483600 | -1.94319900 | -2.96134500 |
| O  | -1.48085600 | -1.17272400 | -4.94681800 |
| Ag | -2.07246100 | 0.93266700  | -5.43793500 |
| Ag | -2.58325900 | 0.57325900  | -1.38771400 |
| C  | 6.43244800  | -2.70466300 | 3.05403600  |
| C  | 7.17012300  | -3.70934500 | 3.64094700  |
| C  | 6.65468200  | -5.02687700 | 3.71018700  |
| C  | 5.41063500  | -5.31415900 | 3.19227600  |
| C  | 4.62608400  | -4.30112500 | 2.58044300  |
| C  | 5.14804900  | -2.96953800 | 2.50801600  |
| C  | 4.35978900  | -1.95782000 | 1.89560200  |
| C  | 3.11775100  | -2.23237000 | 1.36372100  |
| C  | 2.60235800  | -3.55613200 | 1.44910500  |
| C  | 3.33585600  | -4.55635800 | 2.03862100  |
| C  | 2.30799600  | -1.13253600 | 0.72574000  |
| O  | 0.98499800  | -1.08946100 | 1.34791900  |
| H  | 6.82596900  | -1.69214000 | 3.00006900  |
| H  | 8.15214800  | -3.49411800 | 4.05348800  |
| H  | 7.24587800  | -5.81129700 | 4.17506300  |
| H  | 5.01177000  | -6.32459900 | 3.24471400  |
| H  | 4.75758200  | -0.94538900 | 1.85230100  |
| H  | 1.61911200  | -3.77115900 | 1.04269100  |
| H  | 2.93433900  | -5.56530100 | 2.09707500  |
| H  | 2.78168900  | -0.17065300 | 0.93207700  |
| Ag | -5.91760900 | -1.14089800 | 2.70526300  |

B3LYP/6-31G\* (Lanl2DZ for Ag)

Thermal correction to Gibbs Free Energy = 0.272503

Sum of electronic and thermal Free Energies = -2349.816183

M06-2x/6-311++G\*\* (Lanl2DZ for Ag)

Energy = -2349.6583777

Number of Imaginary Frequencies = 1

Lowest Frequency = 88.75i

**in5-a**

|    |             |             |             |
|----|-------------|-------------|-------------|
| C  | 2.16079600  | 0.16552400  | -0.24207400 |
| C  | 2.11722900  | -1.20655100 | 0.46666600  |
| C  | 2.58951500  | 1.27006300  | 0.73091300  |
| N  | 0.80884600  | 0.40466200  | -0.76918600 |
| C  | 3.77635800  | 1.17601900  | 1.47448800  |
| C  | 1.80725800  | 2.42137200  | 0.87922400  |
| C  | 2.19324500  | 3.44013000  | 1.75144900  |
| C  | 3.36837600  | 3.34703200  | 2.50408800  |
| C  | 4.15348600  | 2.19722400  | 2.34295000  |
| C  | 3.76904000  | 4.43512500  | 3.47203800  |
| F  | 1.55870700  | -2.14600100 | -0.32095100 |
| F  | 3.35767500  | -1.65234000 | 0.77917700  |
| F  | 1.40309900  | -1.16174100 | 1.61346500  |
| C  | 0.88498600  | 0.47788500  | -2.04413500 |
| H  | 4.41877200  | 0.30958900  | 1.37573300  |
| H  | 0.89006700  | 2.52705000  | 0.31103100  |
| H  | 1.56345800  | 4.32153900  | 1.84632000  |
| H  | 5.08076600  | 2.09896700  | 2.90287000  |
| H  | 4.85637200  | 4.56586700  | 3.50131300  |
| H  | 3.31786500  | 5.39590700  | 3.20376700  |
| H  | 3.44334900  | 4.19579200  | 4.49313400  |
| C  | -2.85480600 | 0.22508500  | 3.02350100  |
| O  | -2.69312800 | -0.02987000 | 4.27028100  |
| O  | -1.95028000 | -0.27555500 | 2.18471300  |
| O  | -3.84466200 | 0.92284100  | 2.60933500  |
| Ag | -1.39249200 | 0.37054700  | 0.16613700  |
| H  | 0.02706400  | 0.67152200  | -2.68383200 |
| C  | -3.19276700 | 1.40593100  | -2.34719800 |
| O  | -4.25143100 | 1.59591500  | -1.55787600 |
| O  | -2.05987600 | 1.05615900  | -1.89450900 |
| O  | -3.37706700 | 1.60299000  | -3.60917400 |
| Ag | -5.51381300 | 2.16245100  | -3.47487900 |
| Ag | -4.11605100 | 1.26261300  | 0.54300600  |
| C  | 7.99666200  | 0.49114800  | -1.60368100 |
| C  | 9.12644700  | 1.26711700  | -1.73984500 |
| C  | 9.01366200  | 2.65284300  | -2.01238000 |
| C  | 7.77312900  | 3.23689900  | -2.14450700 |
| C  | 6.58893200  | 2.46486800  | -2.00895200 |
| C  | 6.70292100  | 1.06410800  | -1.73194100 |

|    |             |             |             |
|----|-------------|-------------|-------------|
| C  | 5.51639800  | 0.29351800  | -1.60446700 |
| C  | 4.26835200  | 0.86814900  | -1.72740800 |
| C  | 4.16209400  | 2.25825800  | -2.00708400 |
| C  | 5.29082100  | 3.02902300  | -2.14511300 |
| C  | 3.04061100  | 0.01401900  | -1.56961000 |
| O  | 2.07837600  | 0.32631700  | -2.62579300 |
| H  | 8.08085600  | -0.57300700 | -1.39590800 |
| H  | 10.11069200 | 0.81803700  | -1.63932100 |
| H  | 9.91259800  | 3.25389600  | -2.11825100 |
| H  | 7.68386000  | 4.29982400  | -2.35575100 |
| H  | 5.60760200  | -0.77273900 | -1.40535800 |
| H  | 3.18127300  | 2.70753700  | -2.12327400 |
| H  | 5.20171000  | 4.09016400  | -2.36442100 |
| H  | 3.30985000  | -1.03536200 | -1.70975400 |
| Ag | -0.79378100 | -1.21021500 | 3.95536000  |

B3LYP/6-31G\* (Lanl2DZ for Ag)

Thermal correction to Gibbs Free Energy = 0.274198

Sum of electronic and thermal Free Energies = -2349.873226

M06-2x/6-311++G\*\* (Lanl2DZ for Ag)

Energy = -2349.7069577

No imaginary frequency

**in2-b**

|   |             |             |             |
|---|-------------|-------------|-------------|
| C | 3.18314400  | -0.18221800 | 0.77869000  |
| C | 3.49336100  | -0.03656000 | 2.27723500  |
| C | 4.33069300  | -0.80471500 | 0.00654600  |
| N | 1.96101800  | -0.91611400 | 0.64425900  |
| C | 5.16450900  | 0.01939900  | -0.75236600 |
| C | 4.59427500  | -2.17897900 | 0.06240400  |
| C | 5.67138500  | -2.71311100 | -0.63871000 |
| C | 6.51964500  | -1.89542300 | -1.40155300 |
| C | 6.24751800  | -0.52338000 | -1.44540400 |
| C | 7.69531900  | -2.48643600 | -2.14362000 |
| F | 2.46396600  | 0.54127800  | 2.92907500  |
| F | 3.72919600  | -1.22447300 | 2.86688800  |
| F | 4.57814900  | 0.73724800  | 2.43616200  |
| C | 0.86308900  | -1.26425200 | 0.46533800  |
| H | 2.92861500  | 0.82293800  | 0.38907700  |
| H | 4.96657500  | 1.08662200  | -0.80363000 |
| H | 3.95546600  | -2.83121700 | 0.65074000  |
| H | 5.85965900  | -3.78322300 | -0.59178600 |
| H | 6.88582200  | 0.13072300  | -2.03411600 |
| H | 8.46778400  | -2.83674500 | -1.44698700 |
| H | 7.39317900  | -3.34910500 | -2.74898900 |
| H | 8.15855700  | -1.75248600 | -2.81017400 |
| C | -3.60879200 | -0.24623000 | -0.45488500 |

|    |             |             |             |
|----|-------------|-------------|-------------|
| O  | -4.84132600 | 0.05232500  | -0.65854500 |
| O  | -3.33929600 | -1.51020000 | -0.05687900 |
| O  | -2.62607800 | 0.54178500  | -0.59417200 |
| Ag | -1.17646300 | -1.30561400 | 0.11816800  |
| Ag | -5.57368400 | -2.01185200 | -0.11748600 |
| C  | -1.80572200 | 3.73399800  | -0.70232400 |
| C  | -1.84740700 | 4.63334500  | 0.53843100  |
| N  | -0.46413900 | 3.27749400  | -1.13511000 |
| C  | -1.86893800 | 3.86560000  | 1.87002100  |
| C  | -0.90579300 | 2.66922000  | 1.87010700  |
| C  | 0.44080100  | 2.98578800  | 1.18889400  |
| C  | 0.50106000  | 2.73027600  | -0.31276900 |
| C  | -0.45074100 | 2.88515300  | -2.55010200 |
| C  | 0.98021500  | 2.72438100  | -3.04703800 |
| C  | 1.70270400  | 1.74137300  | -2.12939100 |
| N  | 1.52916100  | 2.03779900  | -0.70954400 |
| H  | -2.18644500 | 4.31555500  | -1.54929600 |
| H  | -2.46559800 | 2.86314200  | -0.58790700 |
| H  | -2.74803200 | 5.25644100  | 0.46992700  |
| H  | -0.99746300 | 5.32646100  | 0.50022100  |
| H  | -2.88643900 | 3.50856900  | 2.07325500  |
| H  | -1.61117500 | 4.55641200  | 2.68464300  |
| H  | -1.37935200 | 1.81880700  | 1.36446100  |
| H  | -0.71677900 | 2.35268600  | 2.90350700  |
| H  | 1.23034800  | 2.36610300  | 1.61581900  |
| H  | 0.72536200  | 4.02825200  | 1.39113200  |
| H  | -0.96746500 | 3.66655700  | -3.11925800 |
| H  | -1.02177600 | 1.95364300  | -2.68237900 |
| H  | 1.48549700  | 3.69820200  | -3.02160800 |
| H  | 0.98354800  | 2.37595400  | -4.08677700 |
| H  | 2.77911500  | 1.73280400  | -2.34939200 |
| H  | 1.34547700  | 0.71841500  | -2.32915600 |

B3LYP/6-31G\* (Lanl2DZ for Ag)

Thermal correction to Gibbs Free Energy = 0.351874

Sum of electronic and thermal Free Energies = -1757.239215

M06-2x/6-311++G\*\* (Lanl2DZ for Ag)

Energy = -1757.2958858

No imaginary frequency

**ts1-b**

|   |            |             |             |
|---|------------|-------------|-------------|
| C | 2.94616100 | -0.23755800 | 0.93229500  |
| C | 3.32597300 | 0.18775100  | 2.33501500  |
| C | 4.08360700 | -0.78856200 | 0.11005000  |
| N | 1.82227200 | -1.08114200 | 0.98787600  |
| C | 5.20090400 | 0.01994400  | -0.17026800 |
| C | 4.05091800 | -2.07286700 | -0.44806500 |



|    |             |             |             |
|----|-------------|-------------|-------------|
| C  | 5.09443400  | -2.53284200 | -1.25351100 |
| C  | 6.21136000  | -1.73736200 | -1.52583600 |
| C  | 6.24128200  | -0.45173000 | -0.96539600 |
| C  | 7.35163400  | -2.23985100 | -2.38053500 |
| F  | 2.22807200  | 0.52923500  | 3.05892800  |
| F  | 3.97498500  | -0.75974400 | 3.05161900  |
| F  | 4.13267200  | 1.27515600  | 2.30544600  |
| C  | 0.77332100  | -1.59365300 | 0.92946700  |
| H  | 2.36762100  | 0.84321200  | 0.21229300  |
| H  | 5.25570500  | 1.02320700  | 0.23794900  |
| H  | 3.20519500  | -2.72544700 | -0.25310900 |
| H  | 5.03697200  | -3.53563600 | -1.67143200 |
| H  | 7.09255000  | 0.19743100  | -1.16077200 |
| H  | 8.25553000  | -2.41184200 | -1.78142600 |
| H  | 7.09702700  | -3.18492900 | -2.87097800 |
| H  | 7.61811900  | -1.51738600 | -3.16158500 |
| C  | -3.32632100 | -0.16918600 | -0.63562200 |
| O  | -4.46640600 | 0.33072300  | -0.97140600 |
| O  | -3.34513900 | -1.38279000 | -0.04205400 |
| O  | -2.21080700 | 0.39793100  | -0.81238200 |
| Ag | -1.25011500 | -1.61219300 | 0.44746900  |
| Ag | -5.65551900 | -1.37778800 | -0.15598300 |
| C  | -1.45151600 | 3.49780900  | -1.05149300 |
| C  | -1.48990000 | 4.49209900  | 0.11225800  |
| N  | -0.15421200 | 2.82422800  | -1.31380800 |
| C  | -1.69840700 | 3.84363500  | 1.48914300  |
| C  | -0.85812600 | 2.57018000  | 1.66350000  |
| C  | 0.56358200  | 2.71422400  | 1.08532200  |
| C  | 0.70294100  | 2.34142500  | -0.38134300 |
| C  | -0.07917900 | 2.27375200  | -2.67898700 |
| C  | 1.36893000  | 2.01187900  | -3.07277800 |
| C  | 2.00725500  | 1.10428800  | -2.02925200 |
| N  | 1.72848800  | 1.56728600  | -0.66835100 |
| H  | -1.66616100 | 4.04961900  | -1.97251000 |
| H  | -2.21705500 | 2.71841800  | -0.94875600 |
| H  | -2.31165500 | 5.19160700  | -0.08482100 |
| H  | -0.57409100 | 5.09689500  | 0.09749200  |
| H  | -2.75873000 | 3.59655000  | 1.62382600  |
| H  | -1.44488400 | 4.57411200  | 2.26923500  |
| H  | -1.35873700 | 1.72623400  | 1.17470400  |
| H  | -0.78049200 | 2.31955000  | 2.72788200  |
| H  | 1.25033500  | 2.07272100  | 1.63545500  |
| H  | 0.93262000  | 3.73910600  | 1.22543600  |
| H  | -0.53119500 | 3.00583100  | -3.35527100 |
| H  | -0.68684600 | 1.36037800  | -2.71881000 |
| H  | 1.91242000  | 2.96309500  | -3.12804000 |

|   |            |            |             |
|---|------------|------------|-------------|
| H | 1.41086500 | 1.54830200 | -4.06440200 |
| H | 3.09428600 | 1.05966700 | -2.15253000 |
| H | 1.63370700 | 0.07679300 | -2.14067500 |

B3LYP/6-31G\* (Lanl2DZ for Ag)

Thermal correction to Gibbs Free Energy = 0.351171

Sum of electronic and thermal Free Energies = -1757.224787

M06-2x/6-311++G\*\* (Lanl2DZ for Ag)

Energy = -1757.2856725

Number of Imaginary Frequencies = 1

Lowest Frequency = 1298.15i

### in3-b

|    |             |             |             |
|----|-------------|-------------|-------------|
| C  | -3.04736800 | -0.43589600 | -1.12026600 |
| C  | -3.30770800 | 0.30284300  | -2.38039000 |
| C  | -4.12855100 | -0.80527300 | -0.20007300 |
| N  | -1.91149700 | -1.18191000 | -1.13070900 |
| C  | -5.38809100 | -0.16159500 | -0.22570600 |
| C  | -3.94464800 | -1.79961100 | 0.78408300  |
| C  | -4.95582700 | -2.12248300 | 1.68844000  |
| C  | -6.20032000 | -1.48432800 | 1.66146500  |
| C  | -6.38745400 | -0.49986100 | 0.67959200  |
| C  | -7.30037700 | -1.84131200 | 2.63390700  |
| F  | -2.16101600 | 0.49842700  | -3.08785700 |
| F  | -4.18894400 | -0.28612100 | -3.23573200 |
| F  | -3.82754800 | 1.55097200  | -2.14936300 |
| C  | -0.89161500 | -1.77145300 | -1.08849500 |
| H  | -1.99209400 | 0.99700900  | 0.06635600  |
| H  | -5.58627600 | 0.61091700  | -0.95952100 |
| H  | -3.00154700 | -2.33666200 | 0.83272700  |
| H  | -4.77073000 | -2.90076800 | 2.42678900  |
| H  | -7.34310800 | 0.01853600  | 0.61899100  |
| H  | -8.18271300 | -2.24352300 | 2.11854300  |
| H  | -6.96652000 | -2.59788700 | 3.35217900  |
| H  | -7.63813900 | -0.96735500 | 3.20647800  |
| C  | 3.16062500  | -0.17611000 | 0.60645200  |
| O  | 4.30599900  | 0.32642100  | 0.93158700  |
| O  | 3.17623300  | -1.38272100 | 0.00955100  |
| O  | 2.05329400  | 0.39873200  | 0.80375500  |
| Ag | 1.11396500  | -1.71517900 | -0.53705600 |
| Ag | 5.49026700  | -1.38054900 | 0.10594600  |
| C  | 1.62841400  | 3.51211700  | 1.11899700  |
| C  | 1.57078900  | 4.52824300  | -0.02408700 |
| N  | 0.38101200  | 2.75485000  | 1.40712300  |
| C  | 1.75883100  | 3.92442700  | -1.42418200 |
| C  | 0.96603700  | 2.62321700  | -1.61661900 |
| C  | -0.43182600 | 2.67689300  | -0.96745100 |

|   |             |             |             |
|---|-------------|-------------|-------------|
| C | -0.44974100 | 2.25546700  | 0.48878500  |
| C | 0.39285700  | 2.17459500  | 2.76914800  |
| C | -0.98881100 | 1.68463500  | 3.18753600  |
| C | -1.52611300 | 0.73685600  | 2.12513800  |
| N | -1.38761200 | 1.37159800  | 0.81375400  |
| H | 1.84205000  | 4.05132200  | 2.04657100  |
| H | 2.42187600  | 2.76874800  | 0.97416800  |
| H | 2.36325700  | 5.26375100  | 0.16004800  |
| H | 0.62824700  | 5.08675300  | 0.04022400  |
| H | 2.82297000  | 3.72403000  | -1.59849100 |
| H | 1.45344100  | 4.66786200  | -2.17214600 |
| H | 1.51478200  | 1.77731900  | -1.18840200 |
| H | 0.84186700  | 2.41520600  | -2.68489000 |
| H | -1.10849400 | 2.01058300  | -1.50411700 |
| H | -0.86392000 | 3.68230700  | -1.05077900 |
| H | 0.73961600  | 2.95731000  | 3.45018800  |
| H | 1.12874000  | 1.36252000  | 2.76065200  |
| H | -1.67106500 | 2.53405700  | 3.31131900  |
| H | -0.91663100 | 1.17301300  | 4.15230100  |
| H | -2.58272200 | 0.50113900  | 2.27189400  |
| H | -0.96636400 | -0.20593400 | 2.11969200  |

B3LYP/6-31G\* (Lan12DZ for Ag)

Thermal correction to Gibbs Free Energy = 0.354772

Sum of electronic and thermal Free Energies = -1757.232524

M06-2x/6-311++G\*\* (Lan12DZ for Ag)

Energy = -1757.2996891

No imaginary frequency

### ts2-b

|   |             |             |             |
|---|-------------|-------------|-------------|
| C | -2.11470100 | 0.83567600  | -0.43197100 |
| C | -1.78247300 | 1.85450800  | -1.48176400 |
| C | -3.13903000 | 1.19307500  | 0.58369600  |
| N | -0.92830300 | 0.30605000  | 0.07066000  |
| C | -4.24408000 | 2.02201900  | 0.31286600  |
| C | -3.05713600 | 0.63608600  | 1.87457400  |
| C | -4.02378800 | 0.89810800  | 2.84051000  |
| C | -5.12382600 | 1.72183900  | 2.56952200  |
| C | -5.20574700 | 2.27844600  | 1.28841600  |
| C | -6.19392300 | 1.97095800  | 3.60624600  |
| F | -0.80032200 | 1.43731600  | -2.31631200 |
| F | -2.83454900 | 2.19977200  | -2.24960800 |
| F | -1.29590500 | 3.05332800  | -0.95784800 |
| C | -0.23189000 | -0.65905800 | -0.11238400 |
| H | -4.36174200 | 2.47767900  | -0.66212800 |
| H | -2.21995600 | -0.00946600 | 2.12094000  |
| H | -3.92129900 | 0.44907200  | 3.82668400  |

|    |             |             |             |
|----|-------------|-------------|-------------|
| H  | -6.04387200 | 2.92684900  | 1.04074600  |
| H  | -5.78580400 | 1.93371100  | 4.62268200  |
| H  | -6.66805100 | 2.94920100  | 3.46828600  |
| H  | -6.98899500 | 1.21497000  | 3.54869500  |
| C  | -7.50895400 | -0.84334100 | -1.62168800 |
| C  | -8.71434300 | -1.30883900 | -1.14464700 |
| C  | -8.74728100 | -2.31475400 | -0.14722300 |
| C  | -7.57242400 | -2.83393400 | 0.35175900  |
| C  | -6.31325700 | -2.37523500 | -0.11780300 |
| C  | -6.27873500 | -1.35661100 | -1.12701600 |
| C  | -5.02026600 | -0.89964000 | -1.59632000 |
| C  | -3.83550900 | -1.41534000 | -1.10643100 |
| C  | -3.87896600 | -2.42993600 | -0.11086900 |
| C  | -5.08038900 | -2.89188100 | 0.36905100  |
| C  | -2.51888800 | -0.95429600 | -1.63444900 |
| O  | -1.46592300 | -1.64379100 | -1.42515600 |
| H  | -7.48140100 | -0.07144100 | -2.38781100 |
| H  | -9.64635700 | -0.90607300 | -1.53297900 |
| H  | -9.70387400 | -2.67583300 | 0.22164800  |
| H  | -7.59384000 | -3.60763400 | 1.11640900  |
| H  | -4.99530600 | -0.12568000 | -2.36210600 |
| H  | -2.93568300 | -2.83711800 | 0.23930200  |
| H  | -5.10560100 | -3.67095100 | 1.12843700  |
| H  | -2.59265400 | -0.37195800 | -2.56697700 |
| H  | 0.47600500  | 2.66822100  | 0.03105300  |
| C  | 4.46529600  | -0.95811300 | 0.31035800  |
| O  | 5.74608000  | -1.09529100 | 0.40775200  |
| O  | 3.73889600  | -2.08511400 | 0.23442100  |
| O  | 3.87263700  | 0.15922100  | 0.28374300  |
| Ag | 1.69258500  | -1.41450300 | 0.06714300  |
| Ag | 5.67474900  | -3.33637900 | 0.38636800  |
| C  | 4.97120400  | 3.03717800  | -0.03470100 |
| C  | 5.12340000  | 3.78037800  | -1.36378100 |
| N  | 3.61907200  | 3.05217200  | 0.58685000  |
| C  | 4.67496600  | 2.98016100  | -2.59658300 |
| C  | 3.35106400  | 2.23621000  | -2.36893900 |
| C  | 2.33076700  | 3.07477700  | -1.57229500 |
| C  | 2.46562800  | 2.94158600  | -0.06769700 |
| C  | 3.66649400  | 2.71898700  | 2.02950700  |
| C  | 2.37127400  | 3.09427600  | 2.74147500  |
| C  | 1.19263500  | 2.45990800  | 2.01627600  |
| N  | 1.32239700  | 2.73393900  | 0.58511000  |
| H  | 5.61778300  | 3.51718800  | 0.70560500  |
| H  | 5.26435000  | 1.98309700  | -0.10880400 |
| H  | 6.18458600  | 4.03678900  | -1.46731900 |
| H  | 4.59275900  | 4.73949100  | -1.30286500 |

|   |            |            |             |
|---|------------|------------|-------------|
| H | 5.45030900 | 2.25240200 | -2.86413900 |
| H | 4.58291600 | 3.66769500 | -3.44769600 |
| H | 3.52968300 | 1.29962700 | -1.82954100 |
| H | 2.90099700 | 1.97038100 | -3.33150100 |
| H | 1.31720100 | 2.75926900 | -1.82844200 |
| H | 2.39957400 | 4.13658200 | -1.84232800 |
| H | 4.50767500 | 3.26873600 | 2.46044400  |
| H | 3.87624500 | 1.64519000 | 2.09401900  |
| H | 2.25527700 | 4.18438500 | 2.76470800  |
| H | 2.41174100 | 2.74267100 | 3.77694800  |
| H | 0.23608700 | 2.87103300 | 2.35040400  |
| H | 1.16513300 | 1.37509200 | 2.16591600  |

B3LYP/6-31G\* (Lan12DZ for Ag)

Thermal correction to Gibbs Free Energy = 0.501 924

Sum of electronic and thermal Free Energies = -2256.271305

M06-2x/6-311++G\*\* (Lan12DZ for Ag)

Energy = -2256.4213091

Number of Imaginary Frequencies = 1

Lowest Frequency = 375.10i

**in4-b**

|   |            |             |             |
|---|------------|-------------|-------------|
| C | 2.24888300 | 0.91543300  | -0.35839200 |
| C | 2.70322200 | 1.02859700  | 1.10612100  |
| C | 2.75442700 | 2.09336400  | -1.20358200 |
| N | 0.77376200 | 0.87022900  | -0.34003900 |
| C | 4.05090400 | 2.61746100  | -1.08200100 |
| C | 1.91260900 | 2.65513900  | -2.17065200 |
| C | 2.34562800 | 3.70533200  | -2.98166100 |
| C | 3.63445500 | 4.23379100  | -2.85889500 |
| C | 4.47524400 | 3.66917800  | -1.89092100 |
| C | 4.11521500 | 5.35616500  | -3.74888700 |
| F | 2.08841500 | 0.10682000  | 1.88430900  |
| F | 4.03774400 | 0.80585500  | 1.25347400  |
| F | 2.43515600 | 2.23711100  | 1.63303400  |
| C | 0.35482200 | -0.21508600 | -0.91495000 |
| H | 4.74012800 | 2.21293000  | -0.35126700 |
| H | 0.90672800 | 2.26682100  | -2.28573100 |
| H | 1.66549600 | 4.11948400  | -3.72328500 |
| H | 5.48435800 | 4.05647400  | -1.76647500 |
| H | 4.68971800 | 6.09920100  | -3.18375600 |
| H | 4.77132300 | 4.97957500  | -4.54492600 |
| H | 3.27806600 | 5.87181600  | -4.23094000 |
| C | 7.36749900 | -1.27146000 | -2.24458300 |
| C | 8.33868800 | -1.36586100 | -3.21647800 |
| C | 8.00190800 | -1.19492900 | -4.58231300 |
| C | 6.70015200 | -0.93348400 | -4.94898000 |

|    |             |             |             |
|----|-------------|-------------|-------------|
| C  | 5.67515600  | -0.82886700 | -3.97095100 |
| C  | 6.01564400  | -1.00079800 | -2.58994100 |
| C  | 4.98893100  | -0.90240900 | -1.61427800 |
| C  | 3.68122900  | -0.63754100 | -1.96680400 |
| C  | 3.34956500  | -0.47253600 | -3.33866000 |
| C  | 4.31944000  | -0.56700800 | -4.30845000 |
| C  | 2.63095100  | -0.52458100 | -0.89225000 |
| O  | 1.35414100  | -1.03652800 | -1.35495700 |
| H  | 7.62282500  | -1.40330600 | -1.19555300 |
| H  | 9.36881200  | -1.57300400 | -2.93899400 |
| H  | 8.77679800  | -1.27236400 | -5.34034300 |
| H  | 6.43832900  | -0.80362900 | -5.99667300 |
| H  | 5.25076200  | -1.03437400 | -0.56627600 |
| H  | 2.31609600  | -0.28723600 | -3.61075800 |
| H  | 4.05600300  | -0.44492800 | -5.35659500 |
| H  | 2.92792100  | -1.14886300 | -0.04388600 |
| H  | -0.47765400 | 1.95123600  | 0.36751300  |
| C  | -4.48160600 | -0.42058100 | -0.51584800 |
| O  | -5.75314400 | -0.66594100 | -0.45989300 |
| O  | -3.74991400 | -1.25149400 | -1.28101200 |
| O  | -3.92052300 | 0.52503500  | 0.09826300  |
| Ag | -1.67101600 | -0.73826400 | -1.13417100 |
| Ag | -5.66101300 | -2.45731600 | -1.78007800 |
| C  | -4.22404400 | 2.09040100  | 2.88561600  |
| C  | -3.67803200 | 1.62376800  | 4.23816900  |
| N  | -3.24347200 | 2.66781400  | 1.93303900  |
| C  | -3.07844200 | 0.20844400  | 4.22712900  |
| C  | -2.20688900 | -0.05821800 | 2.99043900  |
| C  | -1.34689200 | 1.15760600  | 2.59156200  |
| C  | -2.04392600 | 2.13385300  | 1.66357800  |
| C  | -3.91173300 | 3.49936600  | 0.90816400  |
| C  | -2.90564500 | 4.27218200  | 0.06348100  |
| C  | -1.88291900 | 3.29630600  | -0.49975100 |
| N  | -1.35234800 | 2.48074600  | 0.58911300  |
| H  | -4.94390600 | 2.89473200  | 3.06392800  |
| H  | -4.74908600 | 1.28587500  | 2.35522100  |
| H  | -4.50865100 | 1.65724800  | 4.95375500  |
| H  | -2.94611000 | 2.35793600  | 4.59806700  |
| H  | -3.88633600 | -0.53296400 | 4.26251500  |
| H  | -2.48868900 | 0.07021100  | 5.14303700  |
| H  | -2.83008200 | -0.33296900 | 2.13294900  |
| H  | -1.54014100 | -0.90602700 | 3.18293500  |
| H  | -0.44681000 | 0.82064200  | 2.07506800  |
| H  | -1.00515800 | 1.70227700  | 3.48139900  |
| H  | -4.57671600 | 4.19059800  | 1.43568900  |
| H  | -4.51383200 | 2.82320300  | 0.29061400  |

|   |             |            |             |
|---|-------------|------------|-------------|
| H | -2.40277400 | 5.03360400 | 0.67197500  |
| H | -3.43128800 | 4.78735900 | -0.74690600 |
| H | -1.04055000 | 3.81054100 | -0.97166600 |
| H | -2.34564100 | 2.63185500 | -1.23917700 |

B3LYP/6-31G\* (Lan12DZ for Ag)

Thermal correction to Gibbs Free Energy = 0.509257

Sum of electronic and thermal Free Energies = -2256.333449

M06-2x/6-311++G\*\* (Lan12DZ for Ag)

Energy = -2256.4954773

No imaginary frequency

**ts3-b**

|    |             |             |             |
|----|-------------|-------------|-------------|
| C  | -3.29595900 | -1.24852900 | 0.25827600  |
| C  | -3.58122700 | -1.26228400 | 1.77769200  |
| C  | -4.61076100 | -1.42952000 | -0.50453900 |
| N  | -2.36204600 | -2.36349300 | 0.01173500  |
| C  | -5.61889000 | -0.45313100 | -0.48387500 |
| C  | -4.84165800 | -2.60375500 | -1.22712900 |
| C  | -6.03863200 | -2.78951900 | -1.92154600 |
| C  | -7.04309900 | -1.81690700 | -1.91331400 |
| C  | -6.81019800 | -0.64576200 | -1.17788800 |
| C  | -8.33561800 | -2.01083100 | -2.67195000 |
| F  | -2.43602200 | -1.18340700 | 2.49565100  |
| F  | -4.33594300 | -0.19532100 | 2.15537800  |
| F  | -4.22741000 | -2.37065700 | 2.16216800  |
| C  | -1.18162900 | -1.94803200 | -0.22086000 |
| H  | 0.16717600  | -2.69308200 | -0.42556100 |
| H  | -5.47839100 | 0.46421100  | 0.07665400  |
| H  | -4.07525800 | -3.37018000 | -1.23359600 |
| H  | -6.19325100 | -3.71244500 | -2.47662700 |
| H  | -7.57346400 | 0.12913700  | -1.14761300 |
| H  | -8.43285200 | -1.28522700 | -3.49005200 |
| H  | -8.39569200 | -3.01280800 | -3.10902200 |
| H  | -9.20770800 | -1.87676900 | -2.02010000 |
| C  | 3.56176800  | 0.57940900  | -0.63294000 |
| O  | 4.82788000  | 0.82051500  | -0.72096600 |
| O  | 2.72325200  | 1.59588900  | -0.88998700 |
| O  | 3.07691000  | -0.54888900 | -0.32534900 |
| Ag | 0.80856800  | 0.54913100  | -0.56508700 |
| Ag | 4.57633100  | 2.95260800  | -1.30572600 |
| C  | 4.51399300  | -3.21282500 | 1.06809700  |
| C  | 4.29234600  | -3.68703000 | 2.50835700  |
| N  | 3.42940100  | -3.50398000 | 0.10320600  |
| C  | 3.48237400  | -2.71327900 | 3.38011600  |
| C  | 2.29113600  | -2.09454600 | 2.63309500  |
| C  | 1.55613200  | -3.10476600 | 1.73029900  |

|   |             |             |             |
|---|-------------|-------------|-------------|
| C | 2.11983100  | -3.24018400 | 0.32539300  |
| C | 3.92167000  | -3.49458100 | -1.28719900 |
| C | 2.86112800  | -4.00896200 | -2.25351000 |
| C | 1.58530100  | -3.20229600 | -2.05224600 |
| N | 1.23158600  | -3.15602200 | -0.63829200 |
| H | 5.38990700  | -3.73314700 | 0.66859500  |
| H | 4.72708300  | -2.13648500 | 1.02295800  |
| H | 5.27926400  | -3.83967400 | 2.96231000  |
| H | 3.81922500  | -4.67668100 | 2.48274700  |
| H | 4.13679000  | -1.90897500 | 3.73950000  |
| H | 3.13086200  | -3.24852900 | 4.27219200  |
| H | 2.62239900  | -1.25320600 | 2.01480800  |
| H | 1.57504600  | -1.69021000 | 3.35803700  |
| H | 0.51054300  | -2.81087500 | 1.61618400  |
| H | 1.54024900  | -4.09864200 | 2.19703800  |
| H | 4.81194600  | -4.13150700 | -1.32404900 |
| H | 4.21635500  | -2.46753000 | -1.53597300 |
| H | 2.66615200  | -5.07194600 | -2.06582400 |
| H | 3.22343300  | -3.91436000 | -3.28287100 |
| H | 0.73973000  | -3.63942100 | -2.59531600 |
| H | 1.72335600  | -2.17605500 | -2.41757200 |
| C | -3.87855200 | 4.36525100  | -2.13717300 |
| C | -4.18518600 | 5.11901500  | -3.24878500 |
| C | -4.12937400 | 4.54157100  | -4.54094300 |
| C | -3.76716100 | 3.22123600  | -4.69683400 |
| C | -3.44569600 | 2.41753100  | -3.57140600 |
| C | -3.50363600 | 3.00085300  | -2.26460900 |
| C | -3.17900800 | 2.19474000  | -1.14023800 |
| C | -2.82247600 | 0.86870200  | -1.27805100 |
| C | -2.76053100 | 0.29907600  | -2.58220100 |
| C | -3.06369700 | 1.05198200  | -3.69034900 |
| C | -2.46289400 | 0.05422600  | -0.06357400 |
| O | -1.12082800 | -0.50389200 | -0.23900900 |
| H | -3.92149600 | 4.80600200  | -1.14372600 |
| H | -4.47245700 | 6.16114600  | -3.13773600 |
| H | -4.37415500 | 5.14578600  | -5.41037300 |
| H | -3.72302800 | 2.77541500  | -5.68785500 |
| H | -3.21979200 | 2.64480000  | -0.14964500 |
| H | -2.47475700 | -0.74248800 | -2.69085100 |
| H | -3.01789400 | 0.60660300  | -4.68145800 |
| H | -2.42684900 | 0.70870800  | 0.80934500  |

B3LYP/6-31G\* (LanL2DZ for Ag)

Thermal correction to Gibbs Free Energy = 0.500642

Sum of electronic and thermal Free Energies = -2256.290456

M06-2x/6-311++G\*\* (LanL2DZ for Ag)

Energy = -2256.4542793



Number of Imaginary Frequencies = 1

Lowest Frequency = 425.20i

**in5-b**

|    |             |             |             |
|----|-------------|-------------|-------------|
| C  | -3.30949700 | -1.34751200 | 0.42322700  |
| C  | -3.42899400 | -1.06988400 | 1.94103800  |
| C  | -4.70384000 | -1.47530900 | -0.19050900 |
| N  | -2.54163200 | -2.59953900 | 0.30110600  |
| C  | -5.58843900 | -0.38737400 | -0.23832600 |
| C  | -5.13285100 | -2.70330700 | -0.70433000 |
| C  | -6.40587900 | -2.83623000 | -1.26020000 |
| C  | -7.29280900 | -1.75593600 | -1.31330200 |
| C  | -6.85748500 | -0.52911500 | -0.79328600 |
| C  | -8.68201000 | -1.90720500 | -1.88778900 |
| F  | -2.20918000 | -1.04136100 | 2.52567000  |
| F  | -3.99408400 | 0.14136400  | 2.17604300  |
| F  | -4.16380900 | -1.99519300 | 2.56768100  |
| C  | -1.38649300 | -2.28702600 | -0.12137900 |
| H  | -0.54210400 | -2.95153100 | -0.28407200 |
| H  | -5.29079900 | 0.57843400  | 0.15366500  |
| H  | -4.46356200 | -3.55486700 | -0.66287500 |
| H  | -6.71394100 | -3.80152900 | -1.65590500 |
| H  | -7.52152700 | 0.33189700  | -0.82423700 |
| H  | -8.97591800 | -1.02403500 | -2.46618500 |
| H  | -8.75133900 | -2.78072300 | -2.54427900 |
| H  | -9.42856100 | -2.03523700 | -1.09253200 |
| C  | 3.92157000  | 1.01996500  | -0.69531600 |
| O  | 4.84151800  | 1.93044000  | -0.67229100 |
| O  | 2.64587400  | 1.46645100  | -0.79388000 |
| O  | 4.14092800  | -0.21776500 | -0.62952500 |
| Ag | 1.51349600  | -0.42208700 | -0.75888800 |
| Ag | 3.43140900  | 3.64069400  | -0.82715100 |
| C  | 5.20567800  | -3.19349200 | 0.59206000  |
| C  | 5.09135600  | -3.55026000 | 2.07947000  |
| N  | 4.00602600  | -3.45990300 | -0.23787900 |
| C  | 4.48724500  | -2.43651400 | 2.95189900  |
| C  | 3.31113900  | -1.71828300 | 2.27272400  |
| C  | 2.38659500  | -2.67577500 | 1.49372100  |
| C  | 2.76668700  | -2.96041100 | 0.04447700  |
| C  | 4.34931500  | -3.70767300 | -1.64590900 |
| C  | 3.12276100  | -4.17641200 | -2.41547800 |
| C  | 2.02925900  | -3.12832900 | -2.24405000 |
| N  | 1.80472700  | -2.77098200 | -0.83476200 |
| H  | 5.99216100  | -3.81416800 | 0.15194500  |
| H  | 5.49904200  | -2.14433600 | 0.45104900  |
| H  | 6.09764000  | -3.78752100 | 2.44652700  |

|   |             |             |             |
|---|-------------|-------------|-------------|
| H | 4.51167100  | -4.47733700 | 2.17051400  |
| H | 5.26233500  | -1.69863200 | 3.19419800  |
| H | 4.16483300  | -2.87279500 | 3.90695000  |
| H | 3.68002900  | -0.95156100 | 1.58258400  |
| H | 2.71549800  | -1.19935400 | 3.03347100  |
| H | 1.37413100  | -2.26690700 | 1.45336100  |
| H | 2.30454800  | -3.63714700 | 2.02071600  |
| H | 5.13478500  | -4.47145500 | -1.66593900 |
| H | 4.76020600  | -2.78907800 | -2.08903300 |
| H | 2.78679700  | -5.14437500 | -2.02246700 |
| H | 3.37059500  | -4.31509600 | -3.47391900 |
| H | 1.07591300  | -3.48390900 | -2.65462700 |
| H | 2.29934800  | -2.22676700 | -2.81299800 |
| C | -3.51173500 | 3.88596900  | -2.74676200 |
| C | -3.86843600 | 4.50958400  | -3.92210900 |
| C | -4.03424300 | 3.75510800  | -5.10942300 |
| C | -3.83996100 | 2.39115700  | -5.09976100 |
| C | -3.47323100 | 1.71839600  | -3.90438100 |
| C | -3.30667800 | 2.48100400  | -2.70370200 |
| C | -2.93648000 | 1.80504400  | -1.50989300 |
| C | -2.75094300 | 0.43853400  | -1.48184600 |
| C | -2.91502500 | -0.31190200 | -2.68023700 |
| C | -3.26304300 | 0.31231400  | -3.85311100 |
| C | -2.35135400 | -0.23355500 | -0.19580700 |
| O | -1.11467500 | -0.98889900 | -0.41440900 |
| H | -3.38410900 | 4.46247000  | -1.83347600 |
| H | -4.02461500 | 5.58463800  | -3.94270900 |
| H | -4.31554900 | 4.25841700  | -6.03038800 |
| H | -3.96583800 | 1.81004100  | -6.01021800 |
| H | -2.79983200 | 2.39038500  | -0.60236700 |
| H | -2.77039500 | -1.38762300 | -2.66195100 |
| H | -3.38764300 | -0.26859000 | -4.76369800 |
| H | -2.11954800 | 0.52542600  | 0.55246400  |

B3LYP/6-31G\* (Lan12DZ for Ag)

Thermal correction to Gibbs Free Energy = 0.504574

Sum of electronic and thermal Free Energies = -2256.316248

M06-2x/6-311++G\*\* (Lan12DZ for Ag)

Energy = -2256.4820336

No imaginary frequency

**ts2-b'**

|   |            |            |             |
|---|------------|------------|-------------|
| C | 2.36440500 | 0.98505000 | -0.35360000 |
| C | 2.50293400 | 0.63336700 | 1.10060900  |
| C | 3.13281000 | 2.15183100 | -0.86660200 |
| N | 1.00342000 | 0.97526400 | -0.66383500 |
| C | 4.38459000 | 2.54375200 | -0.35338500 |

|    |             |             |             |
|----|-------------|-------------|-------------|
| C  | 2.64711900  | 2.86164900  | -1.98248700 |
| C  | 3.36724400  | 3.91216900  | -2.54371700 |
| C  | 4.60718900  | 4.30879500  | -2.02598500 |
| C  | 5.09657500  | 3.59743400  | -0.92467200 |
| C  | 5.37247800  | 5.46902400  | -2.61838300 |
| F  | 1.73881700  | -0.43108000 | 1.44358100  |
| F  | 3.75889000  | 0.37294100  | 1.49075000  |
| F  | 2.05611700  | 1.65482900  | 1.94770700  |
| C  | 0.23499300  | 0.29932000  | -1.29694300 |
| H  | 4.81532600  | 2.02665100  | 0.49436200  |
| H  | 1.69469600  | 2.57740600  | -2.41874100 |
| H  | 2.95678800  | 4.43242400  | -3.40708400 |
| H  | 6.06028100  | 3.86988200  | -0.49866100 |
| H  | 6.40661700  | 5.49342100  | -2.25742100 |
| H  | 5.39904100  | 5.41523700  | -3.71252600 |
| H  | 4.91455100  | 6.43232400  | -2.35332600 |
| C  | 6.99488000  | -2.54421800 | 0.26743400  |
| C  | 7.65673200  | -3.50611100 | 0.99831700  |
| C  | 6.93980600  | -4.58202500 | 1.57777100  |
| C  | 5.57449400  | -4.67293800 | 1.41361600  |
| C  | 4.86213600  | -3.69744500 | 0.66748500  |
| C  | 5.58664100  | -2.60758000 | 0.08064300  |
| C  | 4.87453800  | -1.63431800 | -0.66707100 |
| C  | 3.50503700  | -1.71224200 | -0.83582400 |
| C  | 2.79594500  | -2.80315300 | -0.26042400 |
| C  | 3.45407400  | -3.76160000 | 0.47026900  |
| C  | 2.77454400  | -0.70776600 | -1.66925300 |
| O  | 1.60911200  | -0.98092500 | -2.11326200 |
| H  | 7.54337800  | -1.71779900 | -0.17935800 |
| H  | 8.73361000  | -3.44358100 | 1.13246000  |
| H  | 7.47206300  | -5.33629400 | 2.15154700  |
| H  | 5.02087000  | -5.49871300 | 1.85559200  |
| H  | 5.42721800  | -0.81042600 | -1.11625300 |
| H  | 1.72615600  | -2.85940200 | -0.43408700 |
| H  | 2.90495000  | -4.59501400 | 0.90416400  |
| H  | 3.43605700  | -0.06680300 | -2.27436000 |
| H  | 0.05435000  | 1.96762800  | 1.67735600  |
| C  | -4.33404100 | -0.42827200 | -0.39024300 |
| O  | -5.54289200 | -0.78681000 | -0.10916300 |
| O  | -3.82262100 | -0.87823500 | -1.54792400 |
| O  | -3.62050700 | 0.30208500  | 0.35632800  |
| Ag | -1.75521600 | -0.24580700 | -1.51889200 |
| Ag | -5.77464300 | -2.04992000 | -1.94572100 |
| C  | -4.13200500 | 1.32305500  | 3.23295600  |
| C  | -3.79004100 | 0.56221300  | 4.51573000  |
| N  | -3.02647800 | 2.08799600  | 2.59336800  |

|   |             |             |             |
|---|-------------|-------------|-------------|
| C | -3.12606900 | -0.80458700 | 4.28841500  |
| C | -2.03845700 | -0.76056600 | 3.20508600  |
| C | -1.18353500 | 0.52150500  | 3.27783700  |
| C | -1.76136300 | 1.68561300  | 2.49684200  |
| C | -3.53424800 | 3.11180200  | 1.65110700  |
| C | -2.45781900 | 4.12648100  | 1.28099500  |
| C | -1.22505200 | 3.39418400  | 0.76971900  |
| N | -0.89596400 | 2.32084600  | 1.70729900  |
| H | -4.88565700 | 2.07945700  | 3.47110800  |
| H | -4.54225200 | 0.66667000  | 2.45587600  |
| H | -4.72997500 | 0.41916600  | 5.06221900  |
| H | -3.16921000 | 1.19981100  | 5.15843300  |
| H | -3.88700900 | -1.53914300 | 3.99908900  |
| H | -2.70021200 | -1.15115000 | 5.23923900  |
| H | -2.49169900 | -0.82086700 | 2.20938600  |
| H | -1.37291000 | -1.62450400 | 3.30725700  |
| H | -0.19067500 | 0.32493600  | 2.86830000  |
| H | -1.03086000 | 0.83265000  | 4.31933100  |
| H | -4.37338200 | 3.61330100  | 2.14100300  |
| H | -3.90901000 | 2.57026800  | 0.77517200  |
| H | -2.19669400 | 4.73542900  | 2.15475400  |
| H | -2.84414600 | 4.80047300  | 0.51025900  |
| H | -0.35666400 | 4.05507400  | 0.69979600  |
| H | -1.39738000 | 2.95624500  | -0.21954800 |

B3LYP/6-31G\* (Lan12DZ for Ag)

Thermal correction to Gibbs Free Energy = 0.500377

Sum of electronic and thermal Free Energies = -2256.271768

M06-2x/6-311++G\*\* (Lan12DZ for Ag)

Energy = -2256.4181310

Number of Imaginary Frequencies = 1

Lowest Frequency = 385.31i

#### in4-b'

|   |            |             |             |
|---|------------|-------------|-------------|
| C | 2.24879700 | 0.82247300  | -0.21701500 |
| C | 2.49576900 | 0.92802200  | 1.30367300  |
| C | 2.89872100 | 1.99614800  | -0.95990000 |
| N | 0.77737800 | 0.80611300  | -0.36086300 |
| C | 4.24701700 | 2.34011100  | -0.78635800 |
| C | 2.15730200 | 2.70945600  | -1.91116800 |
| C | 2.73806400 | 3.73698100  | -2.65197200 |
| C | 4.08220400 | 4.09116300  | -2.47585900 |
| C | 4.82117800 | 3.37244600  | -1.53022400 |
| C | 4.71022000 | 5.19686300  | -3.29234800 |
| F | 1.84083300 | -0.04670500 | 1.98162700  |
| F | 3.79438900 | 0.83650600  | 1.66300100  |
| F | 2.03408000 | 2.10753100  | 1.77678700  |

|    |             |             |             |
|----|-------------|-------------|-------------|
| C  | 0.38298600  | -0.36778600 | -0.75130900 |
| H  | 4.85890300  | 1.81229200  | -0.06506800 |
| H  | 1.11728000  | 2.44541500  | -2.06856800 |
| H  | 2.13422200  | 4.27324400  | -3.38161400 |
| H  | 5.86773700  | 3.62124300  | -1.36807400 |
| H  | 5.69618800  | 5.47065000  | -2.90327700 |
| H  | 4.84076100  | 4.89553800  | -4.34007400 |
| H  | 4.08666500  | 6.09883000  | -3.29351500 |
| C  | 7.37548700  | -2.11835200 | -0.34030000 |
| C  | 8.31436400  | -2.92396400 | 0.26467900  |
| C  | 7.92598500  | -3.84250400 | 1.27148700  |
| C  | 6.60582900  | -3.93762300 | 1.65258300  |
| C  | 5.61342900  | -3.11939100 | 1.04962800  |
| C  | 6.00583000  | -2.18945000 | 0.03309800  |
| C  | 5.01135700  | -1.37753200 | -0.57323600 |
| C  | 3.68613300  | -1.45046500 | -0.19220700 |
| C  | 3.30257300  | -2.38527600 | 0.80818700  |
| C  | 4.23987000  | -3.19315400 | 1.40675500  |
| C  | 2.66722500  | -0.55856600 | -0.86292300 |
| O  | 1.39695600  | -1.24832300 | -0.99859500 |
| H  | 7.67090600  | -1.41331900 | -1.11404800 |
| H  | 9.35865900  | -2.85864200 | -0.02890600 |
| H  | 8.67582200  | -4.47335700 | 1.74135200  |
| H  | 6.30432500  | -4.64313000 | 2.42353800  |
| H  | 5.31291000  | -0.68535400 | -1.35711900 |
| H  | 2.25643000  | -2.46424000 | 1.07944400  |
| H  | 3.93488500  | -3.91011200 | 2.16562600  |
| H  | 3.01675800  | -0.33335200 | -1.87550700 |
| H  | -0.54849500 | 1.89089100  | 0.25903400  |
| C  | -4.45047900 | -0.69957100 | -0.35220800 |
| O  | -5.71828400 | -0.96549600 | -0.30555400 |
| O  | -3.68939900 | -1.55453200 | -1.05971000 |
| O  | -3.91896700 | 0.28966400  | 0.21838100  |
| Ag | -1.62571500 | -0.96743500 | -0.93000800 |
| Ag | -5.57373900 | -2.80246900 | -1.55596600 |
| C  | -4.28928600 | 2.18848500  | 2.77310300  |
| C  | -3.71816800 | 1.93439500  | 4.17134000  |
| N  | -3.33970500 | 2.67944300  | 1.74337800  |
| C  | -3.05659200 | 0.55777100  | 4.34447200  |
| C  | -2.18687200 | 0.16313500  | 3.14154400  |
| C  | -1.38001000 | 1.34804000  | 2.57389000  |
| C  | -2.12043200 | 2.16433900  | 1.53335700  |
| C  | -4.04917600 | 3.34217400  | 0.62783400  |
| C  | -3.08306100 | 4.03424500  | -0.32631900 |
| C  | -2.02201800 | 3.03538700  | -0.76573600 |
| N  | -1.44956700 | 2.39590300  | 0.41531100  |

|   |             |             |             |
|---|-------------|-------------|-------------|
| H | -5.04702500 | 2.97399900  | 2.84798100  |
| H | -4.77527100 | 1.29586200  | 2.35986800  |
| H | -4.54652600 | 2.02871100  | 4.88411700  |
| H | -3.01802400 | 2.74156900  | 4.42099600  |
| H | -3.83019100 | -0.20584500 | 4.49323400  |
| H | -2.45183600 | 0.57115700  | 5.26092400  |
| H | -2.80513100 | -0.24886300 | 2.33666200  |
| H | -1.48305100 | -0.62339700 | 3.43557800  |
| H | -0.47190200 | 0.97953500  | 2.09703300  |
| H | -1.05276400 | 2.01866700  | 3.37908100  |
| H | -4.73617100 | 4.07154900  | 1.06890400  |
| H | -4.63002800 | 2.56852200  | 0.11285900  |
| H | -2.60946700 | 4.89192700  | 0.16669200  |
| H | -3.63618700 | 4.41171700  | -1.19229600 |
| H | -1.20670500 | 3.51982400  | -1.31098500 |
| H | -2.45769400 | 2.25925100  | -1.40608200 |

B3LYP/6-31G\* (LanL2DZ for Ag)

Thermal correction to Gibbs Free Energy = 0.509057

Sum of electronic and thermal Free Energies = -2256.331995

M06-2x/6-311++G\*\* (LanL2DZ for Ag)

Energy = -2256.4932464

No imaginary frequency

### ts3-b'

|   |             |             |             |
|---|-------------|-------------|-------------|
| C | -2.99748500 | -1.27833800 | 0.04982800  |
| C | -3.07338400 | -1.31116400 | 1.59349200  |
| C | -4.40416100 | -1.45524700 | -0.52609100 |
| N | -2.09697800 | -2.39043400 | -0.31210500 |
| C | -5.38402300 | -0.46491200 | -0.37086600 |
| C | -4.72966600 | -2.60669500 | -1.25086000 |
| C | -5.99814400 | -2.75810500 | -1.81003000 |
| C | -6.98320500 | -1.77361700 | -1.66073800 |
| C | -6.65052500 | -0.62434400 | -0.93312600 |
| C | -8.36581900 | -1.95792600 | -2.24264400 |
| F | -1.83822300 | -1.29720900 | 2.16027800  |
| F | -3.74637500 | -0.25388500 | 2.10638500  |
| F | -3.68788300 | -2.42391500 | 2.02456700  |
| C | -0.96782600 | -1.96718200 | -0.72759500 |
| H | 0.41041600  | -2.69383500 | -0.84325000 |
| H | -5.16514900 | 0.43524900  | 0.19410300  |
| H | -3.97536500 | -3.37589500 | -1.37181800 |
| H | -6.22581500 | -3.66055800 | -2.37388900 |
| H | -7.39322400 | 0.15972600  | -0.80100700 |
| H | -8.85976600 | -0.99598500 | -2.41705300 |
| H | -8.33215800 | -2.49861800 | -3.19508200 |
| H | -9.00905000 | -2.53614500 | -1.56550400 |

|    |             |             |             |
|----|-------------|-------------|-------------|
| C  | 3.73935400  | 0.58810700  | -0.33423400 |
| O  | 5.01547800  | 0.77999800  | -0.28682400 |
| O  | 2.97862300  | 1.61391700  | -0.74979300 |
| O  | 3.17225600  | -0.50101500 | -0.02393500 |
| Ag | 0.99931000  | 0.61365300  | -0.68387900 |
| Ag | 4.88326600  | 2.90332700  | -0.98946400 |
| C  | 4.38175300  | -3.23433000 | 1.43720600  |
| C  | 3.89322300  | -3.79873500 | 2.77583800  |
| N  | 3.52175600  | -3.47889700 | 0.25609300  |
| C  | 2.89037500  | -2.89991800 | 3.51873400  |
| C  | 1.84117700  | -2.27958700 | 2.58332700  |
| C  | 1.35197300  | -3.25984200 | 1.49910800  |
| C  | 2.18505600  | -3.26544500 | 0.22871400  |
| C  | 4.28356200  | -3.35356000 | -1.00084200 |
| C  | 3.45217000  | -3.79283400 | -2.20059200 |
| C  | 2.13825600  | -3.02259900 | -2.19501300 |
| N  | 1.50425800  | -3.11790700 | -0.88563600 |
| H  | 5.33442900  | -3.71420200 | 1.19238900  |
| H  | 4.56782500  | -2.15392700 | 1.49835400  |
| H  | 4.77556100  | -3.95210500 | 3.40942500  |
| H  | 3.47177400  | -4.79691100 | 2.60379900  |
| H  | 3.43007200  | -2.09726000 | 4.03733100  |
| H  | 2.39590100  | -3.49485400 | 4.29809400  |
| H  | 2.24900400  | -1.39034900 | 2.08972500  |
| H  | 0.97426900  | -1.94974500 | 3.16756700  |
| H  | 0.33090200  | -3.00954100 | 1.20680100  |
| H  | 1.30918000  | -4.28313300 | 1.89457100  |
| H  | 5.17581200  | -3.98209600 | -0.90638100 |
| H  | 4.60315100  | -2.30903800 | -1.10312200 |
| H  | 3.25376200  | -4.87032000 | -2.14601000 |
| H  | 4.01063400  | -3.60421600 | -3.12381500 |
| H  | 1.43509600  | -3.41425900 | -2.93850400 |
| H  | 2.31718700  | -1.96419900 | -2.42629500 |
| C  | -3.66295800 | 4.76027500  | -0.16888300 |
| C  | -3.56893400 | 5.99578000  | 0.43263100  |
| C  | -2.68780400 | 6.19535000  | 1.52415700  |
| C  | -1.91638700 | 5.15492800  | 1.99324400  |
| C  | -1.99170600 | 3.86868600  | 1.39592100  |
| C  | -2.88365200 | 3.66570100  | 0.29385100  |
| C  | -2.95019700 | 2.38071100  | -0.30790900 |
| C  | -2.19835500 | 1.31769500  | 0.15529800  |
| C  | -1.31367200 | 1.53127700  | 1.25378400  |
| C  | -1.21403100 | 2.76840400  | 1.84745400  |
| C  | -2.28234800 | -0.01098700 | -0.55804500 |
| O  | -0.94226200 | -0.52459300 | -0.82090400 |
| H  | -4.33814300 | 4.60502100  | -1.00718200 |

|   |             |            |             |
|---|-------------|------------|-------------|
| H | -4.17217500 | 6.82425600 | 0.07133000  |
| H | -2.62357300 | 7.17484300 | 1.99024100  |
| H | -1.23908400 | 5.30421300 | 2.83089600  |
| H | -3.61290400 | 2.24155800 | -1.15959600 |
| H | -0.73218900 | 0.70250500 | 1.64056000  |
| H | -0.53472200 | 2.91442200 | 2.68395100  |
| H | -2.75213500 | 0.15735400 | -1.53211300 |

B3LYP/6-31G\* (Lan12DZ for Ag)

Thermal correction to Gibbs Free Energy = 0.501189

Sum of electronic and thermal Free Energies = -2256.288490

M06-2x/6-311++G\*\* (Lan12DZ for Ag)

Energy = -2256.4537746

Number of Imaginary Frequencies = 1

Lowest Frequency = 341.42i

**in5-b'**

|    |             |             |             |
|----|-------------|-------------|-------------|
| C  | -3.27187200 | -1.45614100 | 0.40605300  |
| C  | -3.34957400 | -1.22295200 | 1.93387100  |
| C  | -4.68300200 | -1.56227400 | -0.17281200 |
| N  | -2.50879100 | -2.70999000 | 0.24659500  |
| C  | -5.54068000 | -0.45276100 | -0.19676900 |
| C  | -5.13510500 | -2.76796300 | -0.71884100 |
| C  | -6.40884100 | -2.85844600 | -1.28007200 |
| C  | -7.27193800 | -1.75672700 | -1.31003100 |
| C  | -6.81187100 | -0.55298200 | -0.76009000 |
| C  | -8.66238400 | -1.86795600 | -1.89084900 |
| F  | -2.11882000 | -1.24223900 | 2.49908500  |
| F  | -3.90941900 | -0.03357200 | 2.24294900  |
| F  | -4.07621300 | -2.18118400 | 2.52792900  |
| C  | -1.37632900 | -2.39722300 | -0.23371300 |
| H  | -0.53288000 | -3.05849400 | -0.40950400 |
| H  | -5.22403800 | 0.49305400  | 0.22978500  |
| H  | -4.48168200 | -3.63278400 | -0.70193400 |
| H  | -6.73652300 | -3.80594000 | -1.70223100 |
| H  | -7.45865700 | 0.32163600  | -0.76919200 |
| H  | -8.98942000 | -0.92158300 | -2.33516200 |
| H  | -8.71298100 | -2.64148900 | -2.66448300 |
| H  | -9.39529600 | -2.13338700 | -1.11710700 |
| C  | 3.87446900  | 1.11018500  | -0.50661000 |
| O  | 4.77120900  | 2.04217800  | -0.44370700 |
| O  | 2.59276600  | 1.52717700  | -0.63625800 |
| O  | 4.12329900  | -0.12268900 | -0.45172700 |
| Ag | 1.49806800  | -0.38211200 | -0.67327800 |
| Ag | 3.32615200  | 3.72065200  | -0.63186700 |
| C  | 5.23946800  | -3.09469900 | 0.66481600  |
| C  | 5.09754300  | -3.52128200 | 2.13122300  |



|   |             |             |             |
|---|-------------|-------------|-------------|
| N | 4.07302500  | -3.36445100 | -0.21026000 |
| C | 4.43014800  | -2.46978000 | 3.03444900  |
| C | 3.24842500  | -1.76116600 | 2.35460200  |
| C | 2.38068800  | -2.71234900 | 1.50551600  |
| C | 2.81088500  | -2.91559800 | 0.05661000  |
| C | 4.46465900  | -3.53244700 | -1.61749500 |
| C | 3.27662300  | -4.00101900 | -2.44532500 |
| C | 2.14538600  | -2.99646700 | -2.25821000 |
| N | 1.86957100  | -2.71258500 | -0.84125100 |
| H | 6.05881800  | -3.66840700 | 0.22090800  |
| H | 5.49938900  | -2.03095000 | 0.57761500  |
| H | 6.10150800  | -3.73878400 | 2.51643600  |
| H | 4.55031800  | -4.47174000 | 2.16531600  |
| H | 5.17181900  | -1.71797800 | 3.33209400  |
| H | 4.09708400  | -2.96010800 | 3.95915900  |
| H | 3.60891900  | -0.95084900 | 1.71123500  |
| H | 2.61376600  | -1.30021900 | 3.12131500  |
| H | 1.35545600  | -2.33776000 | 1.45370100  |
| H | 2.31842100  | -3.69940800 | 1.98551100  |
| H | 5.27472800  | -4.26967900 | -1.64996600 |
| H | 4.85823100  | -2.58094100 | -2.00319700 |
| H | 2.96078000  | -4.99660800 | -2.10869800 |
| H | 3.55921100  | -4.08097700 | -3.50112400 |
| H | 1.21608700  | -3.36152600 | -2.71317100 |
| H | 2.40212900  | -2.06134400 | -2.77705600 |
| C | -3.29544200 | 4.49851300  | -0.62003000 |
| C | -3.06347500 | 5.78670000  | -0.19180800 |
| C | -2.12690000 | 6.03913400  | 0.84137000  |
| C | -1.43802600 | 4.99852500  | 1.42502200  |
| C | -1.65372800 | 3.65854000  | 1.00505900  |
| C | -2.60366200 | 3.40320400  | -0.03592000 |
| C | -2.81242000 | 2.06369300  | -0.45889000 |
| C | -2.14066200 | 1.00708000  | 0.12426100  |
| C | -1.19165700 | 1.27078000  | 1.15155800  |
| C | -0.95716800 | 2.55781500  | 1.57311700  |
| C | -2.39393600 | -0.39079800 | -0.38482600 |
| O | -1.12578100 | -1.09922700 | -0.55200900 |
| H | -4.01420400 | 4.30199500  | -1.41215000 |
| H | -3.60015700 | 6.61601800  | -0.64432000 |
| H | -1.95660100 | 7.05959700  | 1.17367600  |
| H | -0.72228200 | 5.18852200  | 2.22164100  |
| H | -3.51744800 | 1.87938700  | -1.26684400 |
| H | -0.64946500 | 0.44869100  | 1.60199200  |
| H | -0.22441700 | 2.74617500  | 2.35379200  |
| H | -2.83519100 | -0.32173200 | -1.38325300 |

B3LYP/6-31G\* (Lanl2DZ for Ag)

Thermal correction to Gibbs Free Energy = 0.503726

Sum of electronic and thermal Free Energies = -2256.315960

M06-2x/6-311++G\*\* (Lan12DZ for Ag)

Energy = -2256.4815380

No imaginary frequency
